# Supplementary material for: 20003 活性白土とクルミ粉体を模型雪に用いた吹雪風洞実験における吹きだまり性状について(雪荷重,構造I)
Source: Royal Society of Chemistry journal article supplement (doi:10.1039/d1dt01607e), 2004-07-31
Supplement: d1dt01607e1.pdf [file d1dt01607e1.pdf]

Electronic supporting information for:

## A diamagnetic iron(III) complex and its twisted sister – Structural evidence on partial spin state change in a crystalline iron complex

Esko Salojärvi,<sup>a</sup> Anssi Peuronen,<sup>ab</sup> Akseli Mansikkamäki,<sup>e</sup> Jani Moilanen,<sup>b</sup> Hannu Huhtinen,<sup>c</sup> Johan Linden,<sup>d</sup> Mika Lastusaari<sup>a</sup> and Ari Lehtonen<sup>a\*</sup>

<sup>a</sup>Inorganic Materials Chemistry research group, Department of Chemistry, University of Turku, FI-20014 Turku, Finland

<sup>b</sup>Department of Chemistry, P.O. Box 35, University of Jyväskylä, FI-40014 Jyväskylä, Finland

<sup>c</sup>Wihuri Physical Laboratory, Department of Physics and Astronomy, University of Turku, FI-20014 Turku, Finland

<sup>d</sup>Department of Physics, Åbo Akademi University FI-20500, Turku/Åbo, Finland

<sup>e</sup>NMR Research Unit, University of Oulu, P. O. Box 3000, 90014 Oulu, Finland

### Content:

Tables S1-S4: Crystallographic data and selected bond lengths for **1** and **2**

Table S5: Energies of the complexes calculated at CAM-B3LYP/DKH-def2-TZVP level

Figure S1: Illustration of the asymmetric unit of structure of **2** measured at 95 K

Figures S2-S6: ESI-MS spectra for **2** and **1**

Figures S7-S10: CV spectra for **2** and **1**

Figure S11: SQUID measurements for **1**

Figure S12: Mössbauer measurements for **1**

Figure S13-S17: NMR spectra for **1**

Figure S18: UV/vis-NIR spectra for **1** and **2**

Figures S19 and S20: TGA-DSC measurements for **1** and **2**

Figures S21-S30: Virgin curves measured for **1** and **2**

Figures S31-S32: SQUID measurements for amorphous sample of **2**

Figure S33: Powder X-ray diffraction pattern for amorphous sample of **2**

Figure S34: Mössbauer spectra for amorphous sample of **2**

References

**Table S1.** Summary of crystallographic data for **1** and **2**.

|                                                                 | <b>1</b>                                                                         | <b>2</b> at 120 K                                                                | <b>2</b> at 95 K                                                                 |
|-----------------------------------------------------------------|----------------------------------------------------------------------------------|----------------------------------------------------------------------------------|----------------------------------------------------------------------------------|
| Empirical formula                                               | C <sub>68</sub> H <sub>90</sub> FeN <sub>4</sub> O <sub>4</sub>                  | C <sub>68</sub> H <sub>86</sub> FeN <sub>4</sub> O <sub>4</sub>                  | C <sub>68</sub> H <sub>86</sub> FeN <sub>4</sub> O <sub>4</sub>                  |
| Formula weight                                                  | 1083.28                                                                          | 1079.25                                                                          | 1079.25                                                                          |
| Temperature/K                                                   | 120.0(1)                                                                         | 120.0(1)                                                                         | 95.0(1)                                                                          |
| Crystal system                                                  | Triclinic                                                                        | Monoclinic                                                                       | Monoclinic                                                                       |
| Space group                                                     | <i>P</i> -1                                                                      | <i>P</i> 2 <sub>1</sub> / <i>n</i>                                               | <i>P</i> 2 <sub>1</sub> / <i>c</i>                                               |
| <i>a</i> /Å                                                     | 15.0168(4)                                                                       | 20.6261(9)                                                                       | 33.0889(5)                                                                       |
| <i>b</i> /Å                                                     | 15.4772(6)                                                                       | 26.6719(9)                                                                       | 26.8096(3)                                                                       |
| <i>c</i> /Å                                                     | 16.4464(4)                                                                       | 23.2777(9)                                                                       | 28.7832(4)                                                                       |
| $\alpha$ /°                                                     | 94.107(2)                                                                        | 90                                                                               | 90                                                                               |
| $\beta$ /°                                                      | 107.195(2)                                                                       | 97.960(4)                                                                        | 96.7035(12)                                                                      |
| $\gamma$ /°                                                     | 115.663(3)                                                                       | 90                                                                               | 90                                                                               |
| Volume/Å <sup>3</sup>                                           | 3201.69(19)                                                                      | 12682.5(9)                                                                       | 25359.0(6)                                                                       |
| <i>Z</i>                                                        | 2                                                                                | 8                                                                                | 16                                                                               |
| $\rho_{\text{calc}}$ g cm <sup>-3</sup>                         | 1.124                                                                            | 1.13                                                                             | 1.131                                                                            |
| $\mu$ /mm <sup>-1</sup>                                         | 2.254                                                                            | 2.276                                                                            | 2.276                                                                            |
| <i>F</i> (000)                                                  | 1168                                                                             | 4640                                                                             | 9280                                                                             |
| Crystal size/mm <sup>3</sup>                                    | 0.241 × 0.099 × 0.061                                                            | 0.147 × 0.072 × 0.043                                                            | 0.371 × 0.071 × 0.056                                                            |
| Radiation                                                       | Cu K $\alpha$ ( $\lambda$ = 1.54184)                                             | Cu K $\alpha$ ( $\lambda$ = 1.54184)                                             | Cu K $\alpha$ ( $\lambda$ = 1.54184)                                             |
| 2 $\theta$ range for data collection/°                          | 5.782 to 153.368                                                                 | 7.658 to 139.998                                                                 | 4.254 to 139.998                                                                 |
| Index ranges                                                    | -18 ≤ <i>h</i> ≤ 13, -19 ≤ <i>k</i> ≤ 18,<br>-20 ≤ <i>l</i> ≤ 20                 | -25 ≤ <i>h</i> ≤ 25, -23 ≤ <i>k</i> ≤ 32,<br>-28 ≤ <i>l</i> ≤ 22                 | -40 ≤ <i>h</i> ≤ 39, -32 ≤ <i>k</i> ≤ 22,<br>-35 ≤ <i>l</i> ≤ 29                 |
| Reflections collected                                           | 25813                                                                            | 41536                                                                            | 102261                                                                           |
| Independent reflections                                         | 13175 [ <i>R</i> <sub>int</sub> = 0.0264,<br><i>R</i> <sub>sigma</sub> = 0.0364] | 23680 [ <i>R</i> <sub>int</sub> = 0.0846,<br><i>R</i> <sub>sigma</sub> = 0.1331] | 47984 [ <i>R</i> <sub>int</sub> = 0.0731,<br><i>R</i> <sub>sigma</sub> = 0.1010] |
| Data/restraints/<br>parameters                                  | 13175/0/726                                                                      | 23680/15/1433                                                                    | 47984/36/2904                                                                    |
| Goodness-of-fit on <i>F</i> <sup>2</sup>                        | 1.032                                                                            | 1.034                                                                            | 0.983                                                                            |
| Final <i>R</i> indexes [ <i>I</i> ≥ 2 $\sigma$<br>( <i>I</i> )] | <i>R</i> <sub>1</sub> = 0.0405, <i>wR</i> <sub>2</sub> = 0.1027                  | <i>R</i> <sub>1</sub> = 0.0818, <i>wR</i> <sub>2</sub> =<br>0.1717               | <i>R</i> <sub>1</sub> = 0.0546, <i>wR</i> <sub>2</sub> =<br>0.1086               |
| Final <i>R</i> indexes [all<br>data]                            | <i>R</i> <sub>1</sub> = 0.0489, <i>wR</i> <sub>2</sub> = 0.1086                  | <i>R</i> <sub>1</sub> = 0.1488, <i>wR</i> <sub>2</sub> =<br>0.2052               | <i>R</i> <sub>1</sub> = 0.1069, <i>wR</i> <sub>2</sub> =<br>0.1303               |
| Largest diff.<br>peak/hole / e Å <sup>-3</sup>                  | 0.55/-0.33                                                                       | 0.88/-0.42                                                                       | 0.59/-0.35                                                                       |

**Table S2.** Selected bond lengths (Å) for **1**.

|     |     |            |
|-----|-----|------------|
| Fe1 | O1  | 1.9470(12) |
| Fe1 | O3  | 1.9579(11) |
| Fe1 | N1  | 1.8760(13) |
| Fe1 | N2  | 1.9692(14) |
| Fe1 | N3  | 1.8744(13) |
| Fe1 | N4  | 1.9616(13) |
| O1  | C8  | 1.3247(19) |
| O2  | C14 | 1.3620(19) |
| O3  | C42 | 1.3342(19) |
| O4  | C48 | 1.363(2)   |
| N1  | C1  | 1.349(2)   |
| N1  | C7  | 1.388(2)   |
| N2  | C6  | 1.326(2)   |
| N2  | C13 | 1.424(2)   |
| N3  | C35 | 1.345(2)   |
| N3  | C41 | 1.392(2)   |
| N4  | C40 | 1.336(2)   |
| N4  | C47 | 1.4247(19) |
| C1  | C2  | 1.421(2)   |
| C1  | C6  | 1.451(2)   |
| C2  | C3  | 1.365(2)   |
| C3  | C4  | 1.420(3)   |
| C4  | C5  | 1.356(2)   |
| C5  | C6  | 1.431(2)   |
| C7  | C8  | 1.423(2)   |
| C7  | C12 | 1.403(2)   |
| C8  | C9  | 1.423(2)   |
| C9  | C10 | 1.386(2)   |
| C9  | C19 | 1.534(2)   |
| C10 | C11 | 1.416(2)   |
| C11 | C12 | 1.377(2)   |
| C11 | C23 | 1.531(2)   |
| C13 | C14 | 1.395(2)   |
| C13 | C18 | 1.398(2)   |
| C14 | C15 | 1.404(2)   |
| C15 | C16 | 1.392(2)   |
| C15 | C27 | 1.538(2)   |
| C16 | C17 | 1.396(2)   |
| C17 | C18 | 1.385(2)   |

**Table S3.** Selected bond lengths (Å) for **2** determined at 120 K.

|      |      |          |      |      |          |
|------|------|----------|------|------|----------|
| Fe1A | O1A  | 1.998(3) | Fe1B | O1B  | 2.000(3) |
| Fe1A | O3A  | 2.013(3) | Fe1B | O3B  | 1.997(4) |
| Fe1A | N1A  | 2.079(4) | Fe1B | N1B  | 2.083(4) |
| Fe1A | N2A  | 2.133(4) | Fe1B | N2B  | 2.123(4) |
| Fe1A | N3A  | 2.075(4) | Fe1B | N3B  | 2.046(4) |
| Fe1A | N4A  | 2.145(4) | Fe1B | N4B  | 2.144(4) |
| O1A  | C8A  | 1.306(6) | O1B  | C8B  | 1.294(6) |
| O2A  | C5A  | 1.381(6) | O2B  | C5B  | 1.380(6) |
| O2A  | C14A | 1.397(6) | O2B  | C14B | 1.378(6) |
| O3A  | C42A | 1.316(6) | O3B  | C42B | 1.307(6) |
| O4A  | C39A | 1.367(6) | O4B  | C39B | 1.366(7) |
| O4A  | C48A | 1.384(5) | O4B  | C48B | 1.366(6) |
| N1A  | C1A  | 1.354(6) | N1B  | C1B  | 1.361(6) |
| N1A  | C7A  | 1.372(6) | N1B  | C7B  | 1.362(6) |
| N2A  | C6A  | 1.332(6) | N2B  | C6B  | 1.333(6) |
| N2A  | C13A | 1.389(6) | N2B  | C13B | 1.384(6) |
| N3A  | C35A | 1.351(6) | N3B  | C35B | 1.336(7) |
| N3A  | C41A | 1.373(6) | N3B  | C41B | 1.382(6) |
| N4A  | C40A | 1.336(6) | N4B  | C40B | 1.333(6) |
| N4A  | C47A | 1.390(6) | N4B  | C47B | 1.398(6) |
| C1A  | C2A  | 1.410(6) | C1B  | C2B  | 1.423(7) |
| C1A  | C6A  | 1.457(6) | C1B  | C6B  | 1.448(7) |
| C2A  | C3A  | 1.366(7) | C2B  | C3B  | 1.361(8) |
| C3A  | C4A  | 1.424(7) | C3B  | C4B  | 1.419(9) |
| C4A  | C5A  | 1.341(7) | C4B  | C5B  | 1.347(8) |
| C5A  | C6A  | 1.414(7) | C5B  | C6B  | 1.423(7) |
| C7A  | C8A  | 1.433(6) | C7B  | C8B  | 1.443(6) |
| C7A  | C12A | 1.412(6) | C7B  | C12B | 1.415(6) |
| C8A  | C9A  | 1.422(7) | C8B  | C9B  | 1.432(6) |
| C9A  | C10A | 1.372(7) | C9B  | C10B | 1.380(7) |
| C9A  | C19A | 1.536(7) | C9B  | C19B | 1.528(6) |
| C10A | C11A | 1.417(7) | C10B | C11B | 1.414(7) |
| C11A | C12A | 1.375(7) | C11B | C12B | 1.361(7) |
| C11A | C23A | 1.537(7) | C11B | C23B | 1.535(6) |
| C13A | C14A | 1.398(7) | C13B | C14B | 1.411(7) |
| C13A | C18A | 1.392(7) | C13B | C18B | 1.393(7) |
| C14A | C15A | 1.404(7) | C14B | C15B | 1.398(7) |
| C15A | C16A | 1.379(7) | C15B | C16B | 1.381(7) |
| C15A | C27A | 1.539(7) | C15B | C27B | 1.534(7) |
| C16A | C17A | 1.390(7) | C16B | C17B | 1.415(7) |
| C17A | C18A | 1.379(7) | C17B | C18B | 1.379(6) |

**Table S4.** Selected bond lengths (Å) for **2** determined at 95 K.

|      |      |            |      |      |            |
|------|------|------------|------|------|------------|
| Fe1A | O1A  | 1.9971(18) | Fe1C | O1C  | 2.0014(18) |
| Fe1A | O3A  | 2.0125(19) | Fe1C | O3C  | 2.0196(19) |
| Fe1A | N1A  | 2.072(2)   | Fe1C | N1C  | 2.076(2)   |
| Fe1A | N2A  | 2.126(2)   | Fe1C | N2C  | 2.128(2)   |
| Fe1A | N3A  | 2.078(2)   | Fe1C | N3C  | 2.085(2)   |
| Fe1A | N4A  | 2.146(2)   | Fe1C | N4C  | 2.157(2)   |
| O1A  | C8A  | 1.303(3)   | O1C  | C1C  | 1.305(3)   |
| O2A  | C5A  | 1.368(3)   | O2C  | C11C | 1.374(3)   |
| O2A  | C14A | 1.386(4)   | O2C  | C14C | 1.382(3)   |
| O3A  | C41A | 1.303(3)   | O3C  | C41C | 1.308(3)   |
| O4A  | C39A | 1.371(3)   | O4C  | C39C | 1.375(3)   |
| O4A  | C48A | 1.389(3)   | O4C  | C48C | 1.382(3)   |
| N1A  | C1A  | 1.349(4)   | N1C  | C6C  | 1.370(4)   |
| N1A  | C7A  | 1.365(4)   | N1C  | C7C  | 1.350(4)   |
| N2A  | C6A  | 1.336(4)   | N2C  | C12C | 1.333(4)   |
| N2A  | C13A | 1.394(3)   | N2C  | C13C | 1.391(4)   |
| N3A  | C35A | 1.344(4)   | N3C  | C35C | 1.347(4)   |
| N3A  | C46A | 1.367(4)   | N3C  | C46C | 1.362(4)   |
| N4A  | C40A | 1.335(4)   | N4C  | C40C | 1.337(4)   |
| N4A  | C47A | 1.381(4)   | N4C  | C47C | 1.383(4)   |
| C1A  | C2A  | 1.415(4)   | C1C  | C2C  | 1.430(4)   |
| C1A  | C6A  | 1.455(4)   | C1C  | C6C  | 1.438(4)   |
| C2A  | C3A  | 1.366(4)   | C2C  | C3C  | 1.379(4)   |
| C3A  | C4A  | 1.423(4)   | C2C  | C19C | 1.534(4)   |
| C4A  | C5A  | 1.360(4)   | C3C  | C4C  | 1.418(5)   |
| C5A  | C6A  | 1.424(4)   | C4C  | C5C  | 1.377(4)   |
| C7A  | C8A  | 1.445(4)   | C4C  | C23C | 1.535(4)   |
| C7A  | C12A | 1.417(4)   | C5C  | C6C  | 1.410(4)   |
| C8A  | C9A  | 1.432(4)   | C7C  | C8C  | 1.420(4)   |
| C9A  | C10A | 1.383(4)   | C7C  | C12C | 1.457(4)   |
| C9A  | C19A | 1.529(4)   | C8C  | C9C  | 1.378(4)   |
| C10A | C11A | 1.414(4)   | C9C  | C10C | 1.410(4)   |
| C11A | C12A | 1.373(4)   | C10C | C11C | 1.367(4)   |
| C11A | C23A | 1.538(4)   | C11C | C12C | 1.417(4)   |
| C13A | C14A | 1.400(4)   | C13C | C14C | 1.407(4)   |
| C13A | C18A | 1.400(4)   | C13C | C18C | 1.397(4)   |
| C14A | C15A | 1.405(4)   | C14C | C15C | 1.399(4)   |
| C15A | C16A | 1.392(5)   | C15C | C16C | 1.393(4)   |
| C15A | C27A | 1.535(4)   | C15C | C27C | 1.532(4)   |
| C16A | C17A | 1.395(5)   | C16C | C17C | 1.407(4)   |
| C17A | C18A | 1.385(4)   | C17C | C18C | 1.380(4)   |

|      |      |            |      |      |            |
|------|------|------------|------|------|------------|
| Fe1B | O1B  | 2.010(2)   | Fe1D | O1D  | 1.9613(19) |
| Fe1B | O3B  | 2.0075(19) | Fe1D | O3D  | 1.9555(19) |
| Fe1B | N1B  | 2.064(2)   | Fe1D | N1D  | 1.903(2)   |
| Fe1B | N2B  | 2.141(2)   | Fe1D | N2D  | 1.987(2)   |
| Fe1B | N3B  | 2.093(2)   | Fe1D | N3D  | 1.924(2)   |
| Fe1B | N4B  | 2.136(2)   | Fe1D | N4D  | 1.979(2)   |
| O1B  | C7B  | 1.306(4)   | O1D  | C7D  | 1.308(4)   |
| O2B  | C5B  | 1.372(4)   | O2D  | C5D  | 1.372(4)   |
| O2B  | C14B | 1.381(4)   | O2D  | C14D | 1.383(4)   |
| O3B  | C41B | 1.296(3)   | O3D  | C41D | 1.308(3)   |
| O4B  | C39B | 1.373(4)   | O4D  | C39D | 1.363(4)   |
| O4B  | C48B | 1.381(3)   | O4D  | C48D | 1.377(4)   |
| N1B  | C1B  | 1.344(4)   | N1D  | C1D  | 1.345(4)   |
| N1B  | C12B | 1.369(4)   | N1D  | C12D | 1.391(4)   |
| N2B  | C6B  | 1.340(4)   | N2D  | C6D  | 1.338(4)   |
| N2B  | C13B | 1.394(4)   | N2D  | C13D | 1.402(4)   |
| N3B  | C35B | 1.348(4)   | N3D  | C35D | 1.360(4)   |
| N3B  | C46B | 1.363(4)   | N3D  | C46D | 1.379(4)   |
| N4B  | C40B | 1.335(4)   | N4D  | C40D | 1.334(4)   |
| N4B  | C47B | 1.392(4)   | N4D  | C47D | 1.400(4)   |
| C1B  | C2B  | 1.415(4)   | C1D  | C2D  | 1.431(4)   |
| C1B  | C6B  | 1.452(4)   | C1D  | C6D  | 1.436(4)   |
| C2B  | C3B  | 1.368(5)   | C2D  | C3D  | 1.357(5)   |
| C3B  | C4B  | 1.416(5)   | C3D  | C4D  | 1.419(5)   |
| C4B  | C5B  | 1.359(5)   | C4D  | C5D  | 1.357(4)   |
| C5B  | C6B  | 1.420(4)   | C5D  | C6D  | 1.413(4)   |
| C7B  | C8B  | 1.438(4)   | C7D  | C8D  | 1.434(4)   |
| C7B  | C12B | 1.434(4)   | C7D  | C12D | 1.423(4)   |
| C8B  | C9B  | 1.385(5)   | C8D  | C9D  | 1.379(5)   |
| C8B  | C19B | 1.529(4)   | C9D  | C10D | 1.412(5)   |
| C9B  | C10B | 1.411(5)   | C10D | C11D | 1.383(5)   |
| C10B | C11B | 1.377(4)   | C10D | C23D | 1.531(5)   |
| C11B | C12B | 1.411(4)   | C11D | C12D | 1.406(4)   |
| C13B | C14B | 1.406(4)   | C13D | C14D | 1.403(4)   |
| C13B | C18B | 1.391(4)   | C13D | C18D | 1.396(4)   |
| C14B | C15B | 1.402(4)   | C14D | C15D | 1.400(4)   |
| C15B | C16B | 1.394(5)   | C15D | C16D | 1.393(4)   |
| C15B | C27B | 1.537(5)   | C15D | C27D | 1.541(4)   |
| C16B | C17B | 1.400(5)   | C16D | C17D | 1.390(4)   |
| C17B | C18B | 1.391(5)   | C17D | C18D | 1.394(4)   |

**Table S5.** Energies of the complexes calculated at CAM-B3LYP/DKH-def2-TZVP level.

| Complex  | Temperature | Ion  | In Hartree atomic units |                 |                                 | In $\text{cm}^{-1}$             |
|----------|-------------|------|-------------------------|-----------------|---------------------------------|---------------------------------|
|          |             |      | $E_{\text{LS}}$         | $E_{\text{HS}}$ | $E_{\text{LS}} - E_{\text{HS}}$ | $E_{\text{LS}} - E_{\text{HS}}$ |
| <b>1</b> | High        | Fe1  | -4438.955731            | -4438.924726    | -0.031005                       | -6804.80                        |
| <b>2</b> | High        | Fe1A | -4436.512913            | -4436.557350    | 0.044437                        | 9752.76                         |
| <b>2</b> | High        | Fe1B | -4436.520471            | -4436.558130    | 0.037659                        | 8265.12                         |
| <b>2</b> | Low         | Fe1A | -4436.492469            | -4436.529037    | 0.036569                        | 8025.88                         |
| <b>2</b> | Low         | Fe1B | -4436.513513            | -4436.548245    | 0.034732                        | 7622.90                         |
| <b>2</b> | Low         | Fe1C | -4436.508080            | -4436.556009    | 0.047929                        | 10519.19                        |
| <b>2</b> | Low         | Fe1D | -4436.543020            | -4436.542700    | -0.000321                       | -70.39                          |

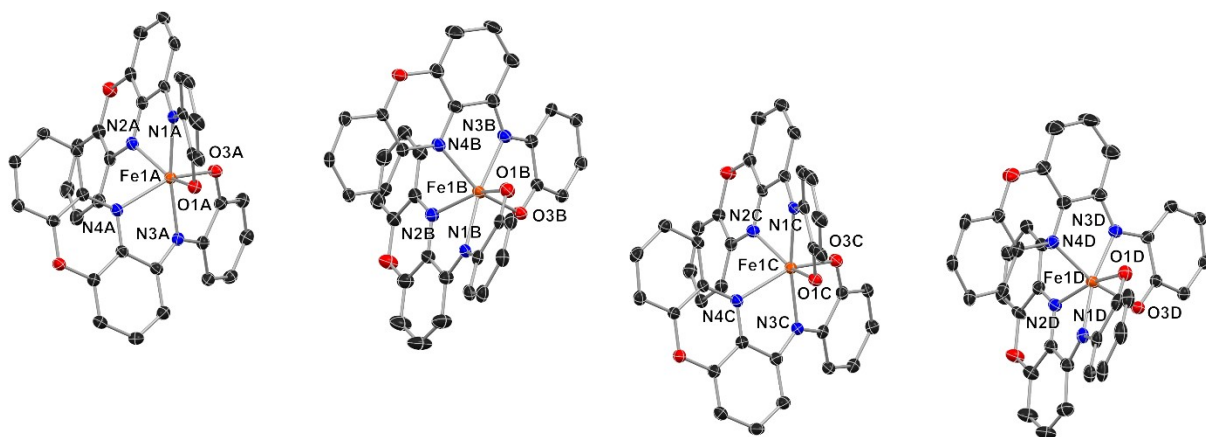

**Figure S1** Illustration of the asymmetric unit of structure of **2** measured at 95 K. H atoms and *tert*-butyl groups are omitted for clarity.

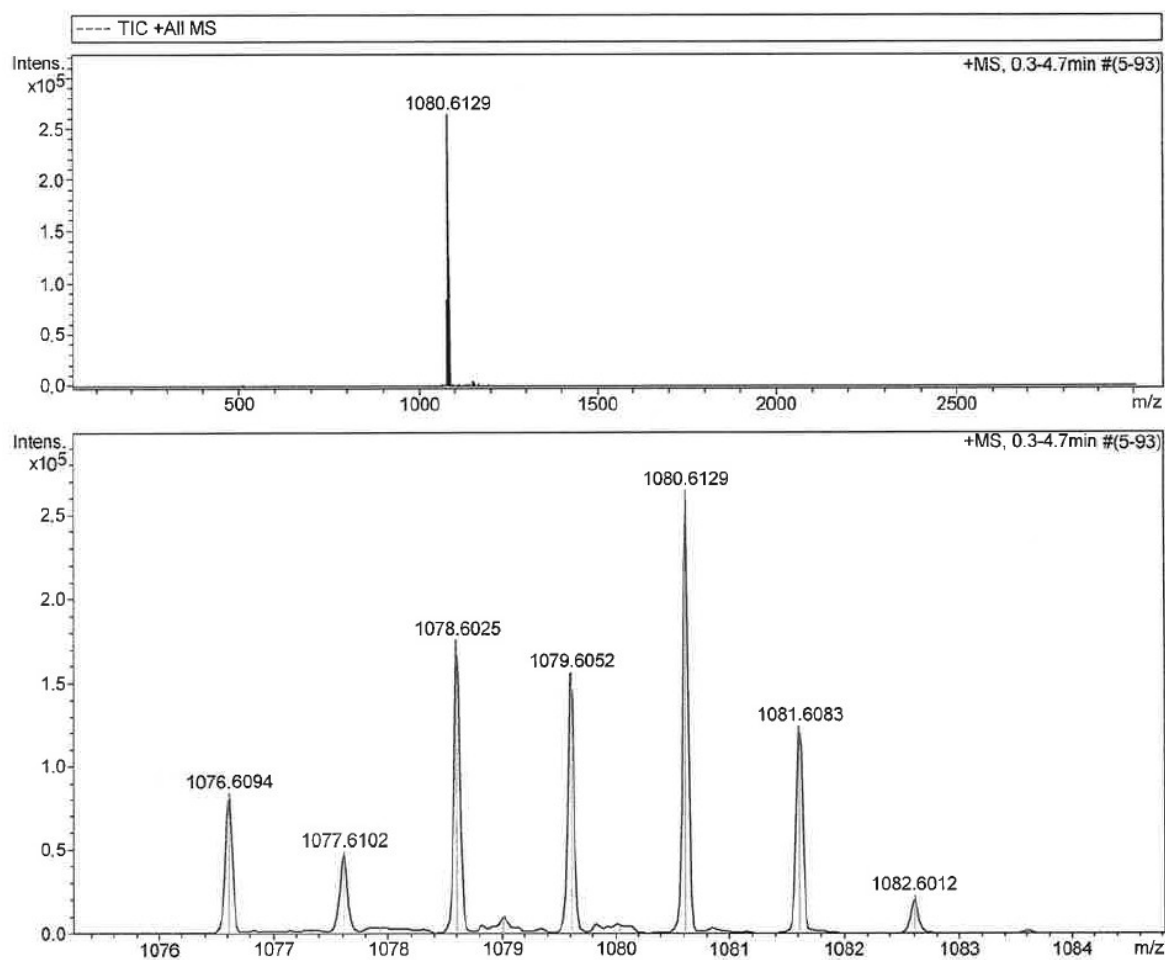

**Figure S2** ESI-MS(+) spectrum of **2** in  $\text{CH}_2\text{Cl}_2$



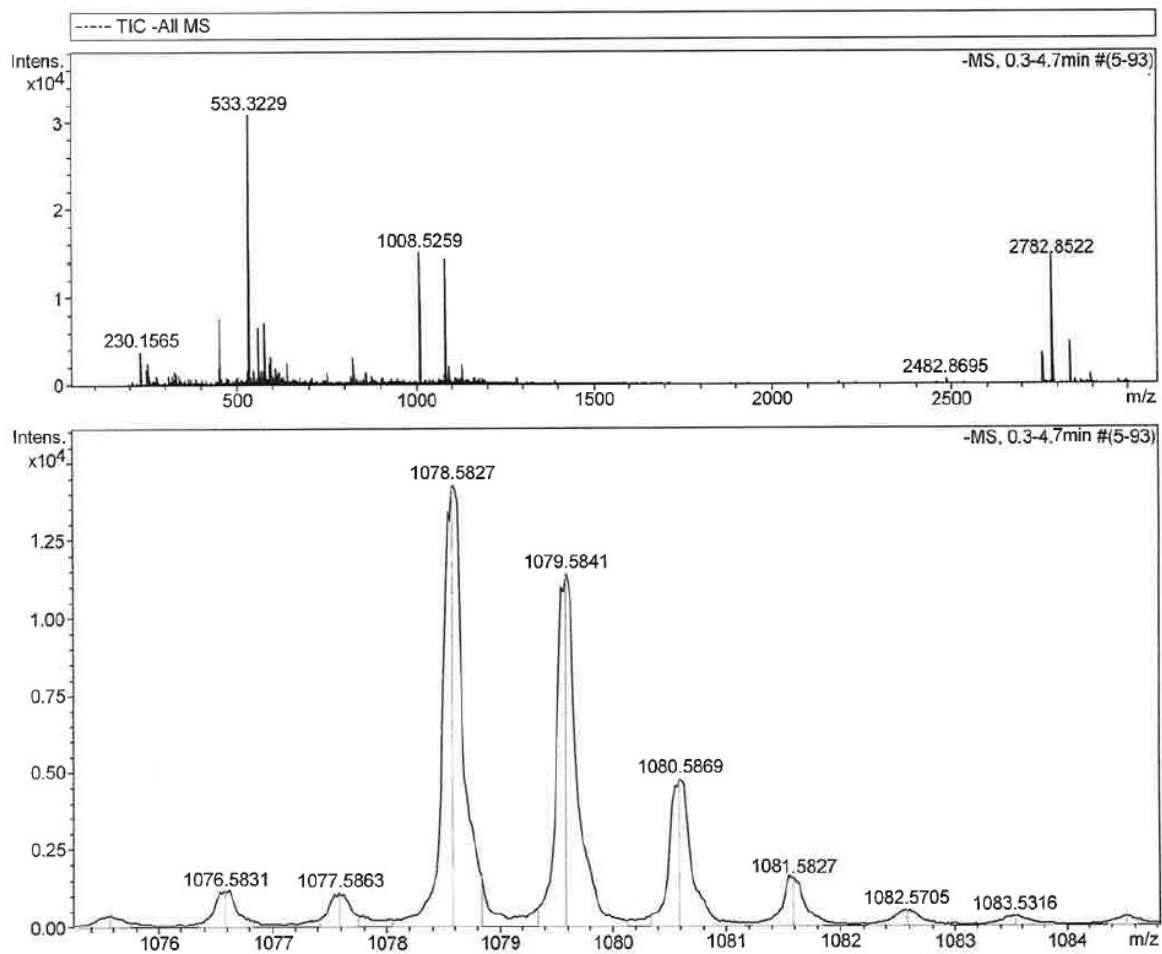

**Figure S3** ESI-MS(-) spectrum of **2** in MeCN

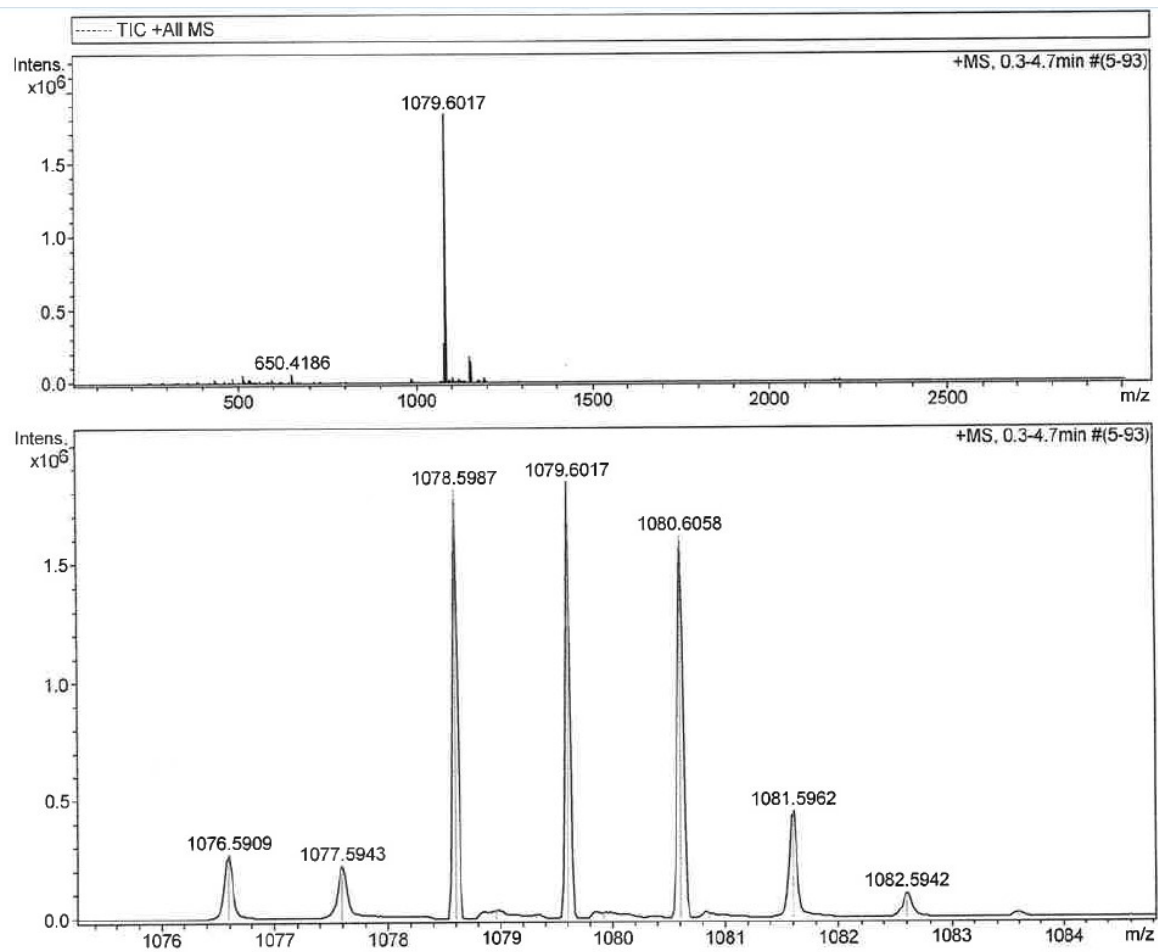

**Figure S4** ESI-MS(+) spectrum of **2** in MeCN

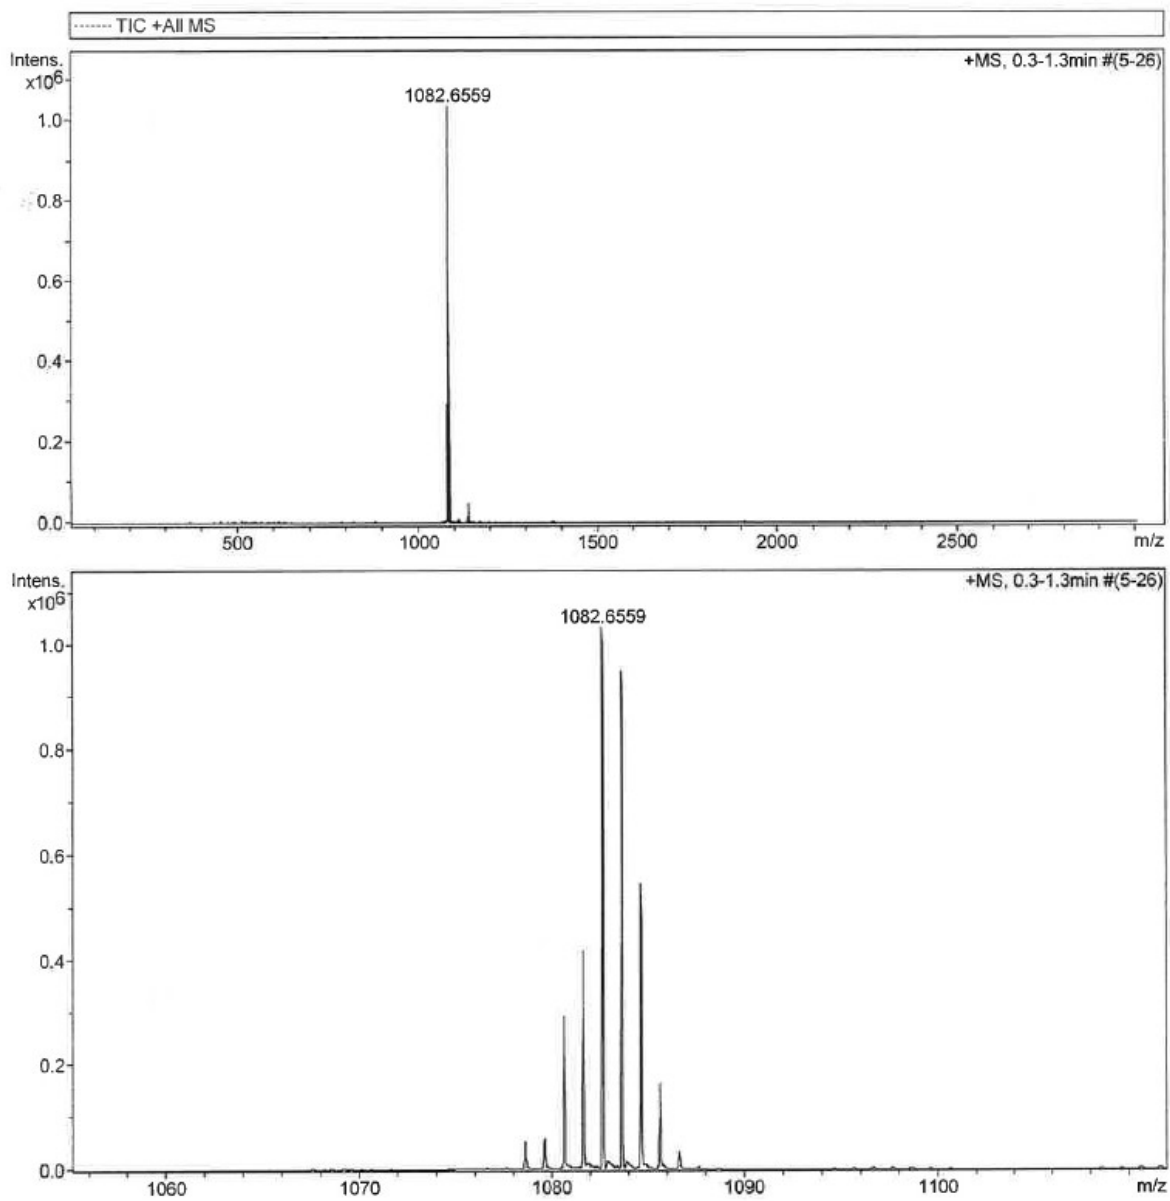

**Figure S5** ESI-MS(+) spectrum of **1** in CH<sub>2</sub>Cl<sub>2</sub>

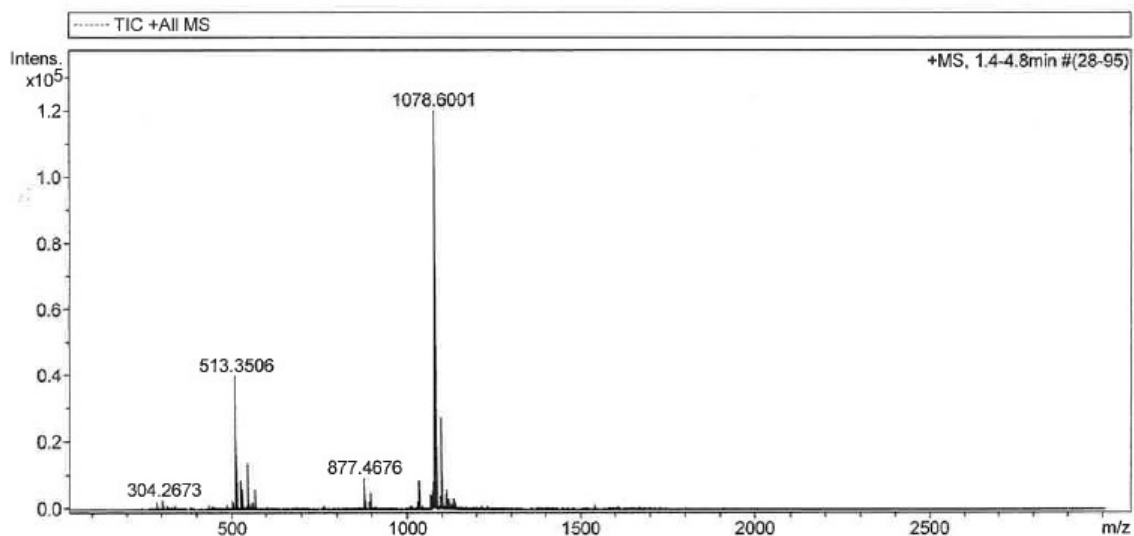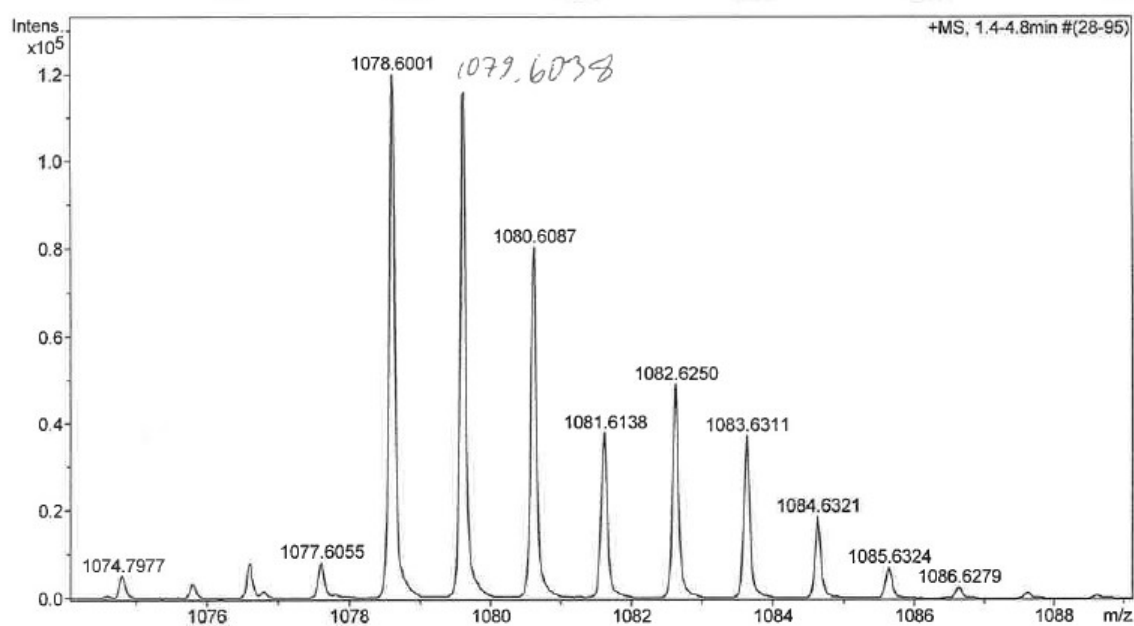

**Figure S6** ESI-MS(+) spectrum of **1** in MeCN

**Cyclic voltammetry (CV)** was applied to define the redox stabilities and the characteristic redox behaviour of the complexes, while the voltammograms were measured in the potential range from +1.5 to -2.1 V vs.  $\text{Fc}^+/\text{Fc}$ .<sup>18</sup> During the first three or four scans, the voltammograms underwent an alteration process for both complexes. During these processes, some of the signals were lost from the voltammograms and then the signals that were left, stayed for subsequent scans. CV for **1** and **2** were recorded at ambient temperature using a platinum working electrode, a 1-mm-diameter platinum counter electrode, and a Ag/AgCl reference electrode. Samples were dissolved in  $\text{CH}_2\text{Cl}_2$  containing 0.1 M  $(\text{Bu}_4\text{N})\text{ClO}_4$  as the supporting electrolyte. The voltammogram was recorded at scan rate of 100 mV/s, while the potentials were measured in volts versus the  $\text{Fc}^+/\text{Fc}$  couple. The continuous scanning of **1** produced two, reversible one-electron transfer waves at -0.21 and +0.61 V. For **2**, the voltammogram manifested two observable one-electron transfer waves at -0.12 and +0.52 V.

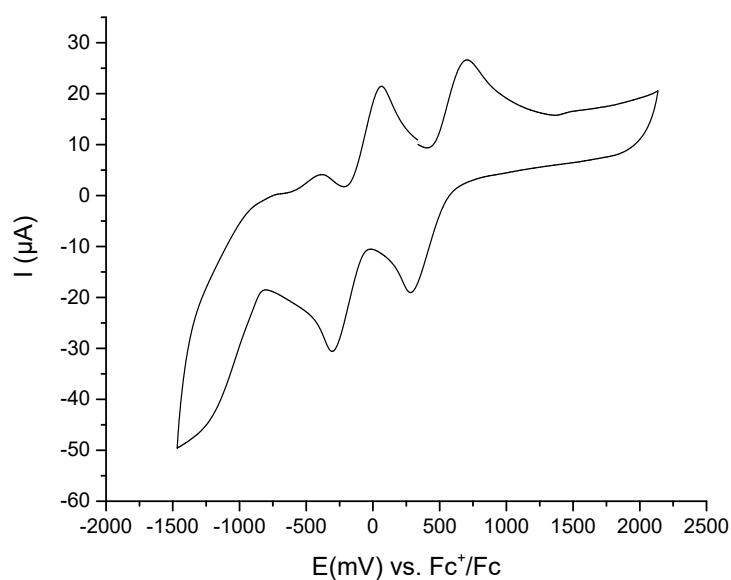

**Figure S7** CV for **2** measured in  $\text{CH}_2\text{Cl}_2$  potential vs.  $\text{Fc}^+/\text{Fc}$  at  $300 \text{ mVs}^{-1}$  scan rate at RT. The scan is performed in a clockwise manner.

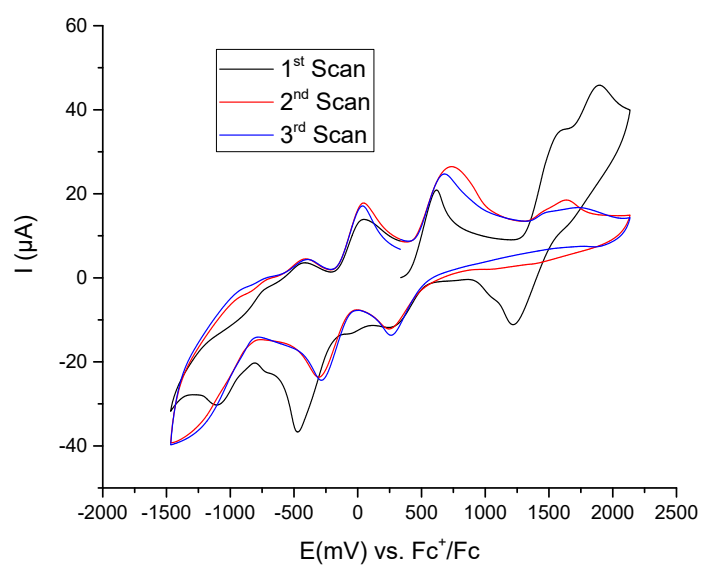

**Figure S8** The first CV scans for **2** measured in  $\text{CH}_2\text{Cl}_2$  potential vs.  $\text{Fc}^+/\text{Fc}$  at  $200 \text{ mVs}^{-1}$  scan rate at RT. The scan is performed in a clockwise manner.

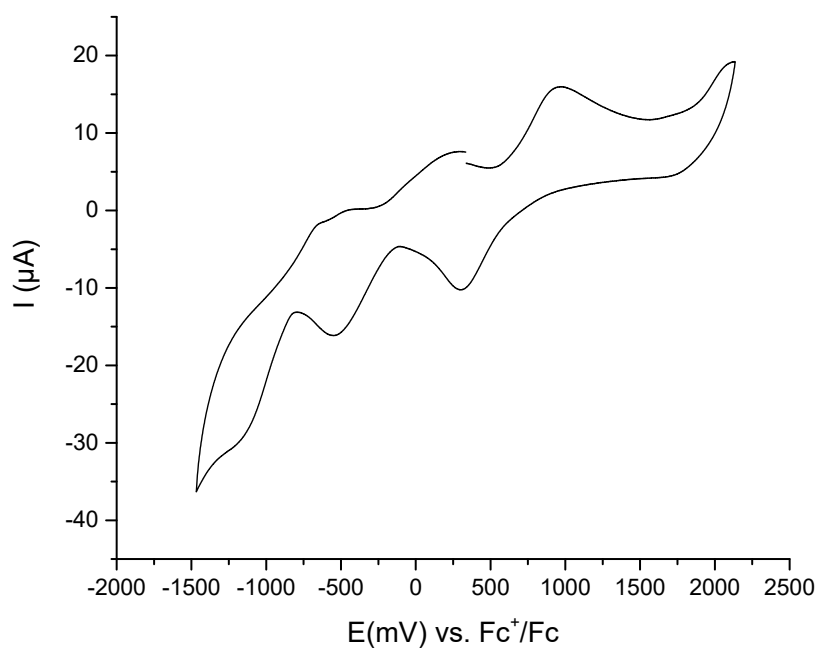

**Figure S9** CV for **1** measured in  $\text{CH}_2\text{Cl}_2$  potential vs.  $\text{Fc}^+/\text{Fc}$  at  $300 \text{ mVs}^{-1}$  scan rate at RT. The scan is performed in a clockwise manner.

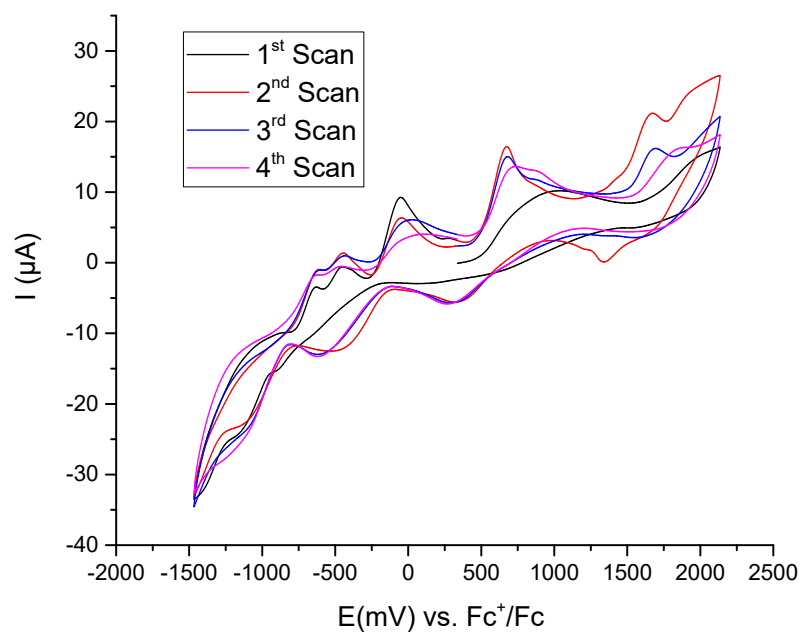

**Figure S10** The first CV scans for **1** measured in  $\text{CH}_2\text{Cl}_2$  potential vs.  $\text{Fc}^+/\text{Fc}$  at  $200 \text{ mVs}^{-1}$  scan rate at RT. The scan is performed in a clockwise manner.

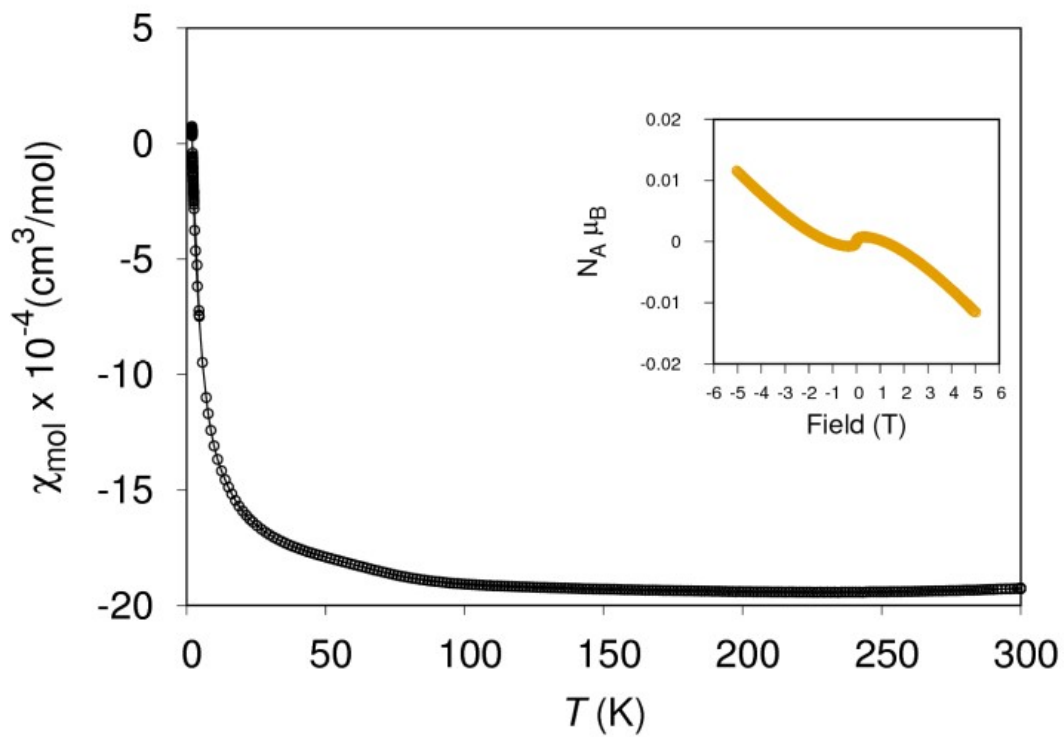

**Figure S11** SQUID measurements for **1** measured in the solid state. The inset represents the field dependence at 2K for **1**.

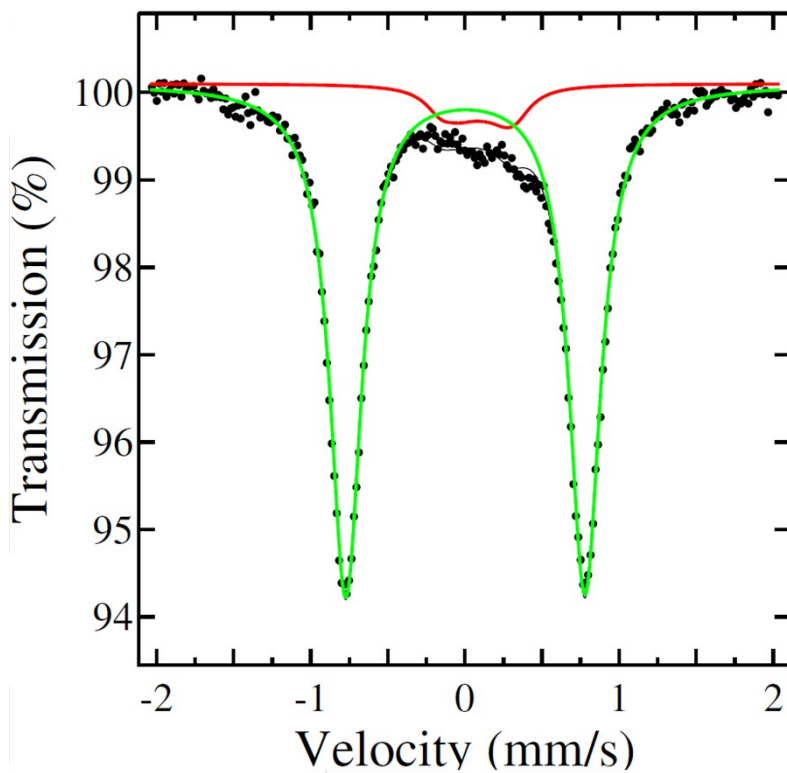

**Figure S12** Mössbauer measurements for **1** measured at 77 K. The red signal is Fe impurity present in the apparatus.

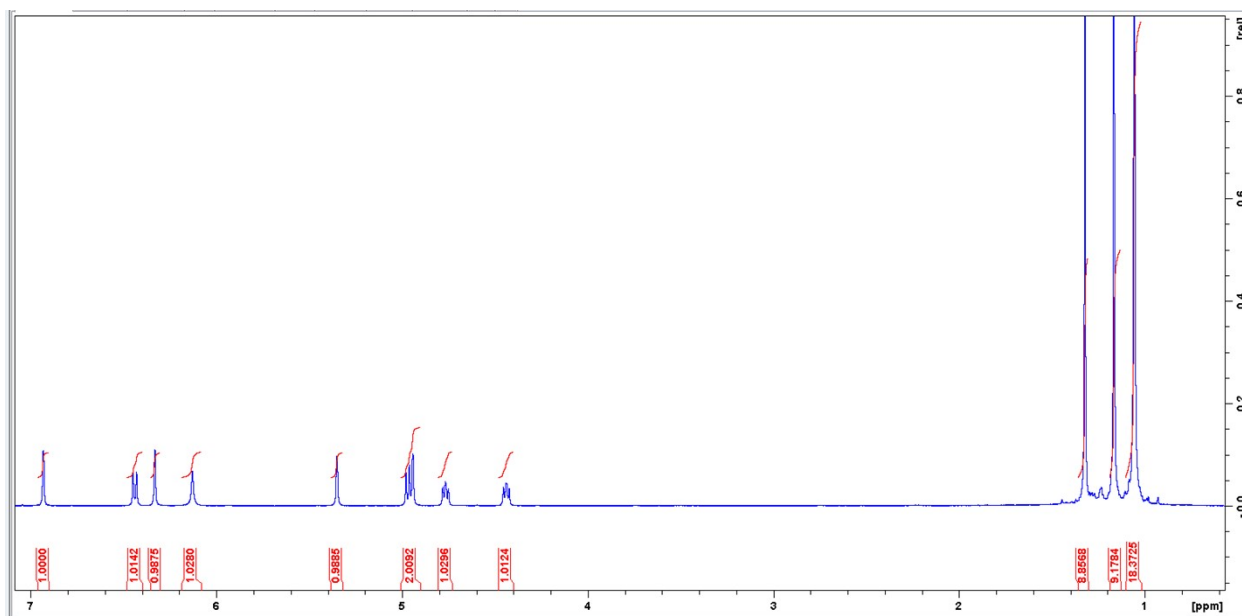

**Figure S13** Measured  $^1\text{H-NMR}$  spectrum for **1**



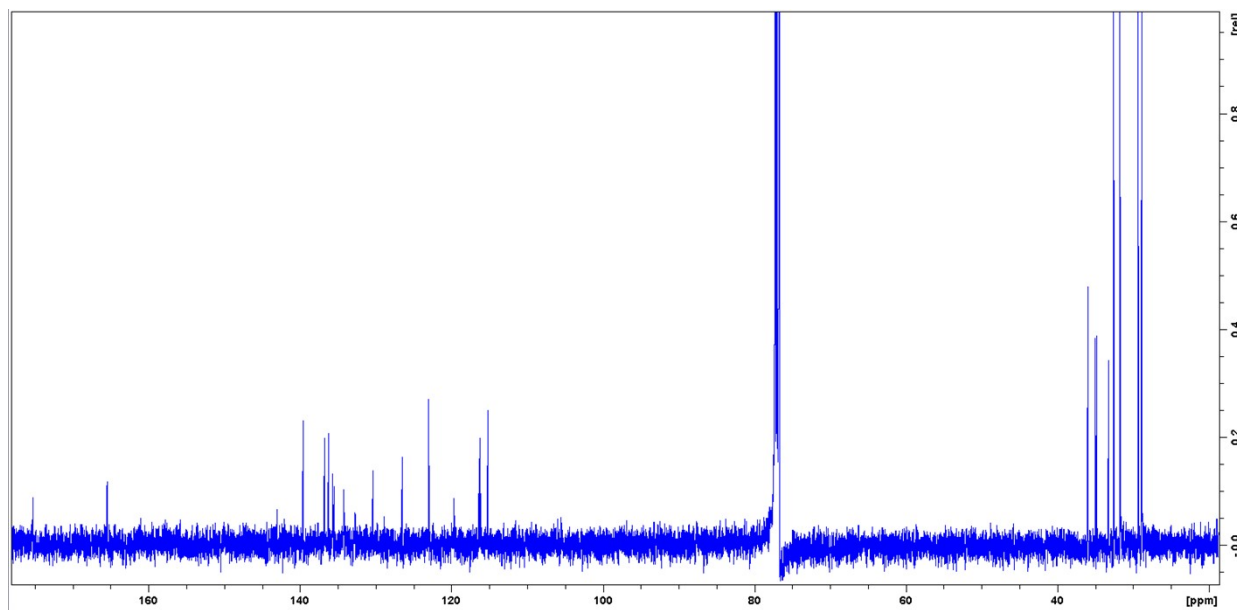

**Figure S14** Measured  $^{13}\text{C}$ -NMR spectrum for **1**

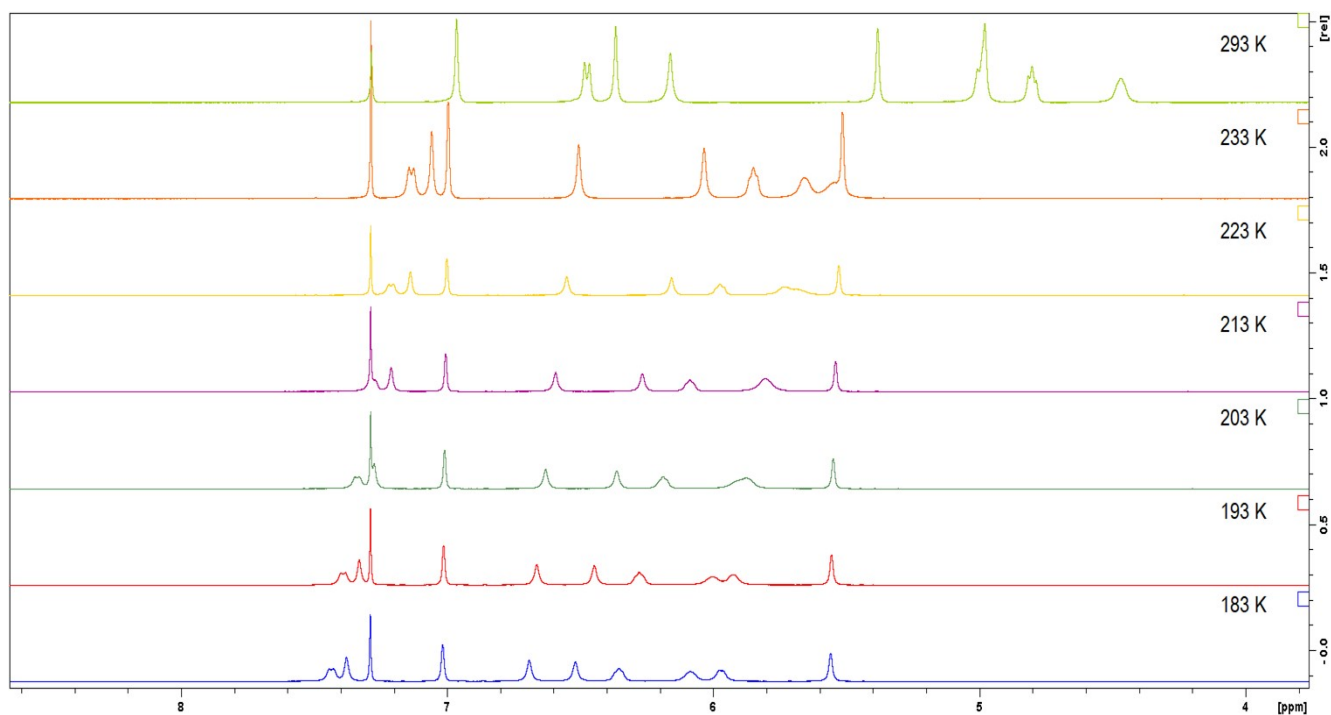

**Figure S15** The aromatic area of the measured  $^1\text{H-NMR}$  spectrum for **1** at variable temperatures

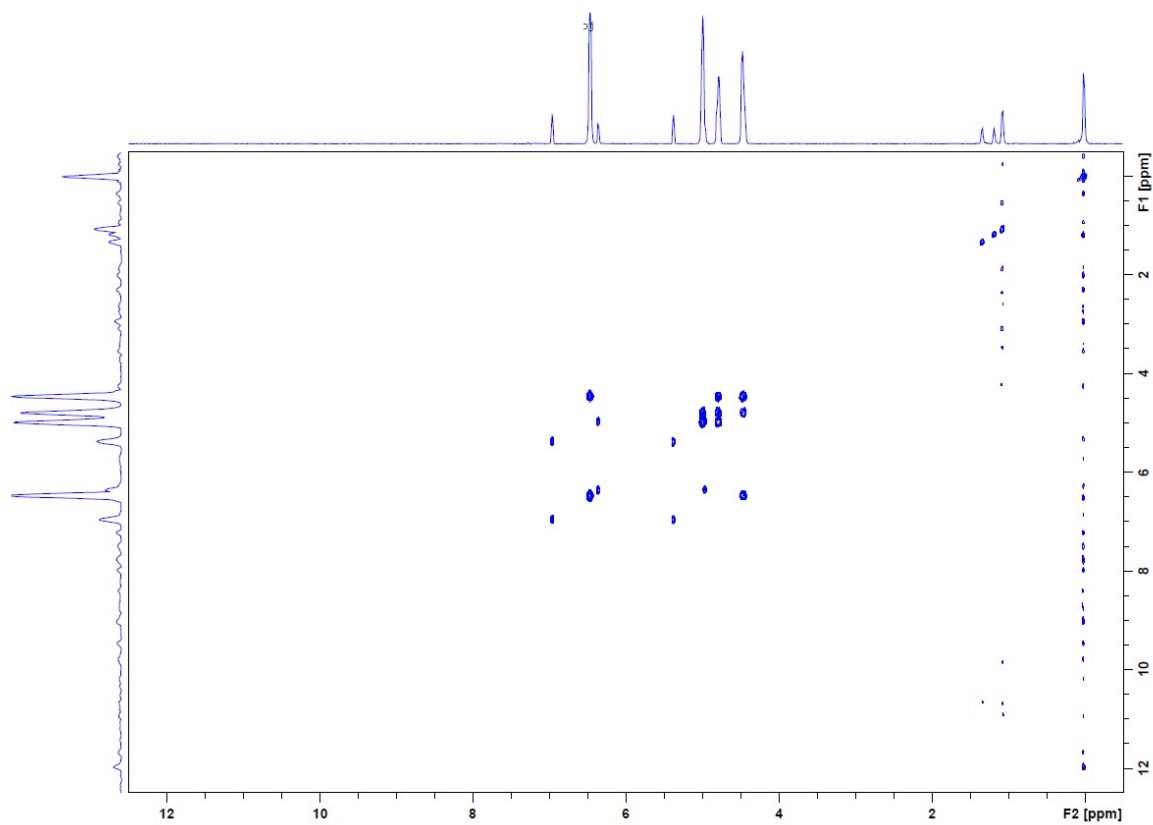

**Figure S16** The 2D-COSY spectrum for **1**.

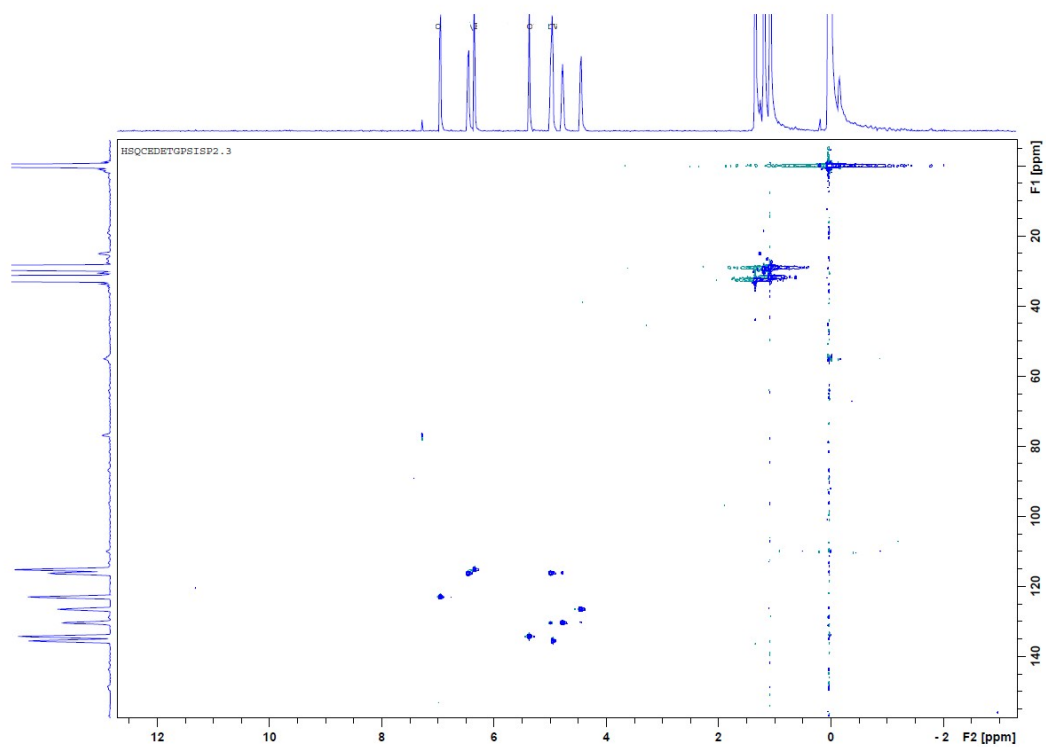

**Figure S17** The 2D-HSQC spectrum for **1**.

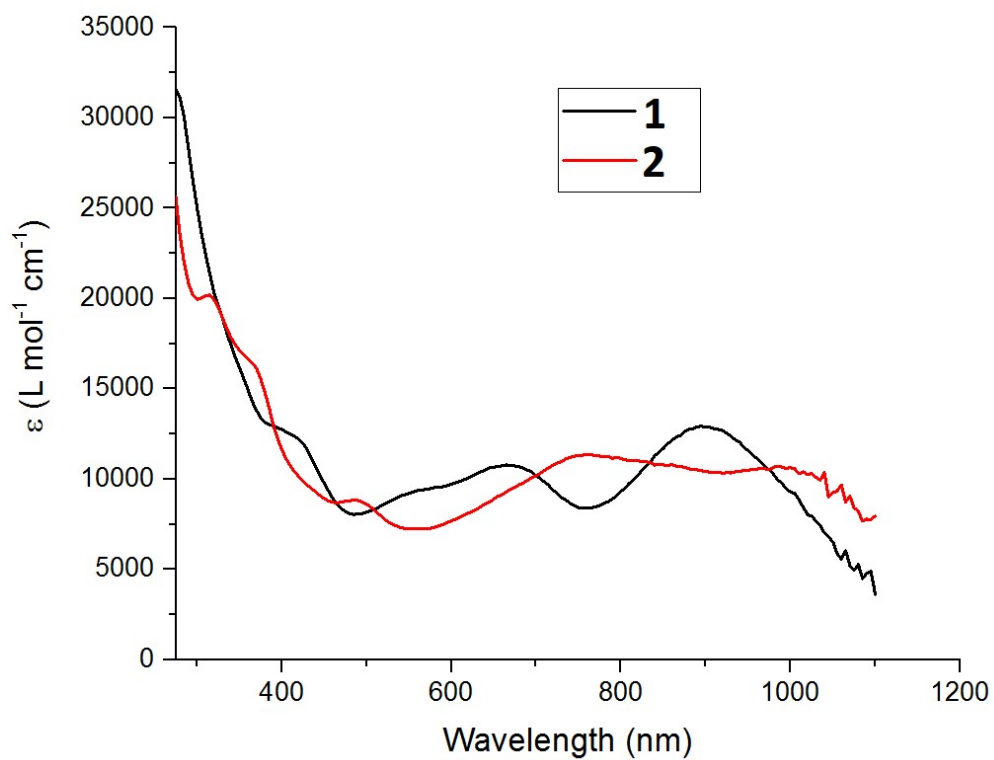

**Figure S18** UV/vis/NIR spectra of the iron complexes in  $\text{CH}_2\text{Cl}_2$  solution at RT.

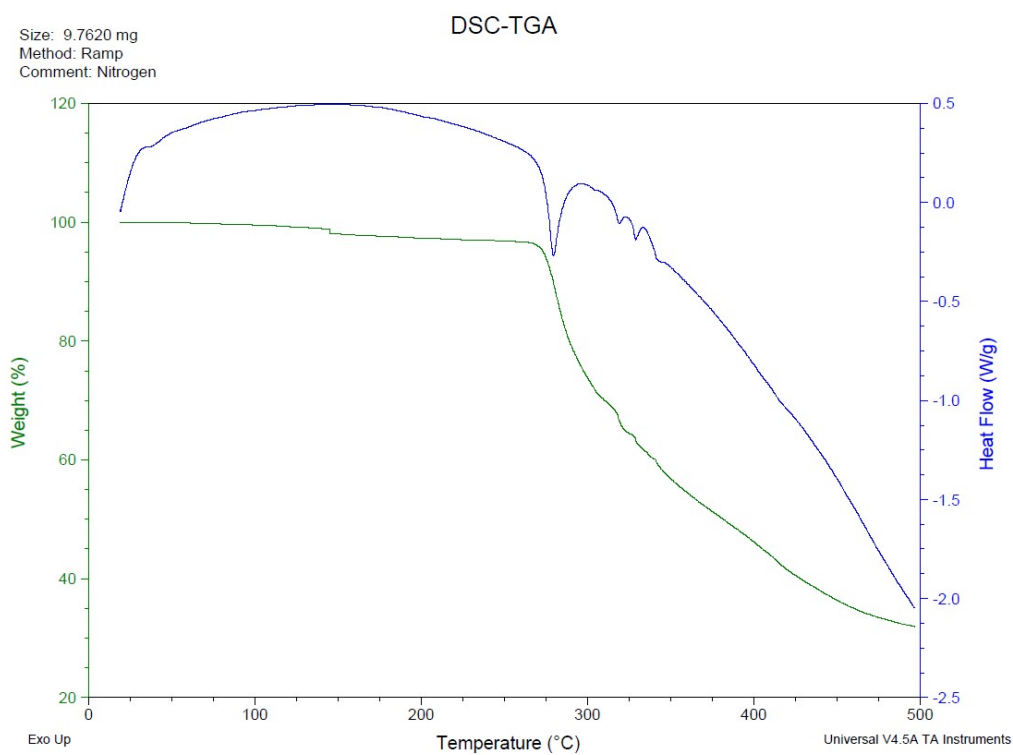

**Figure S19** TGA-DSC measurements for **1**.

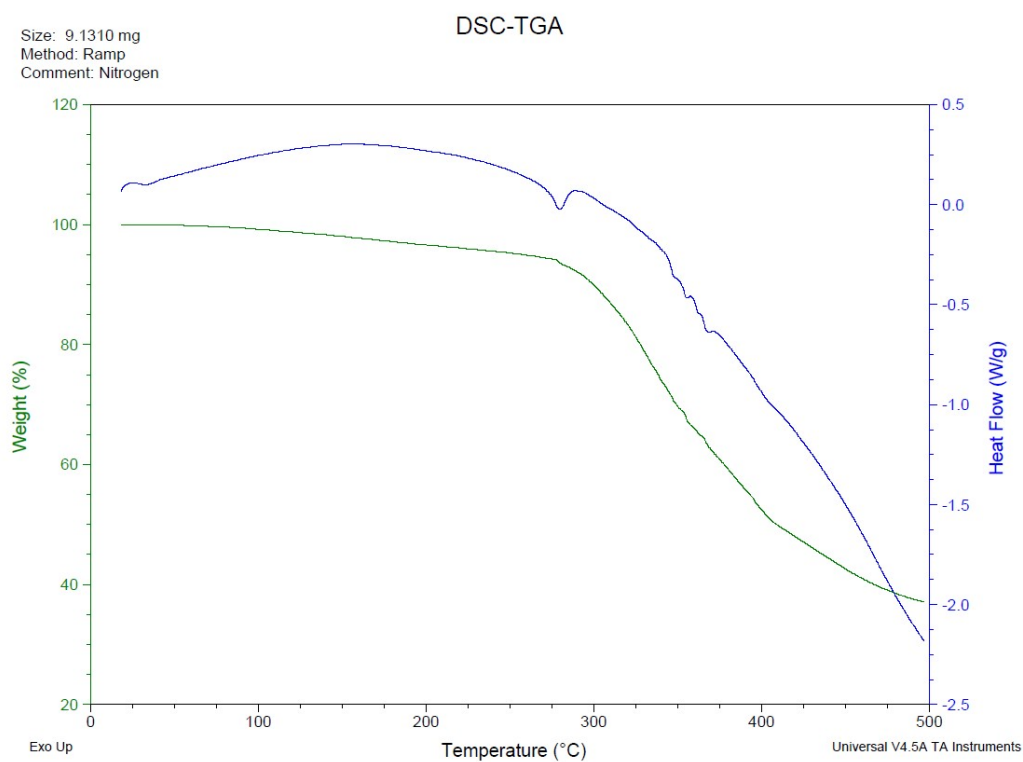

**Figure S20** TGA-DSC measurements for **2**.

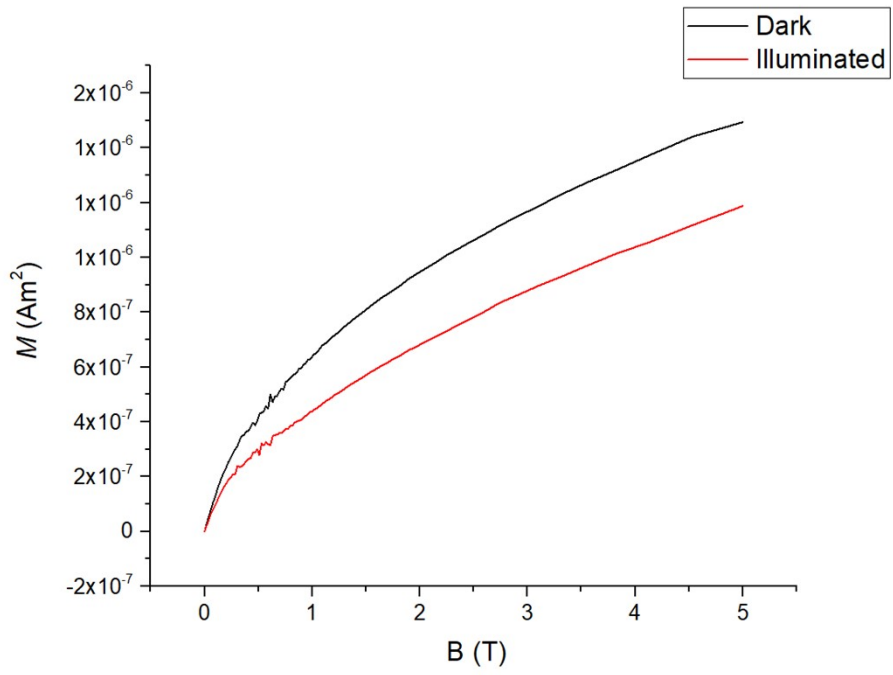

**Figure S21** The measured virgin curves of **1** on a SrTiO<sub>3</sub> disk at 2 K.

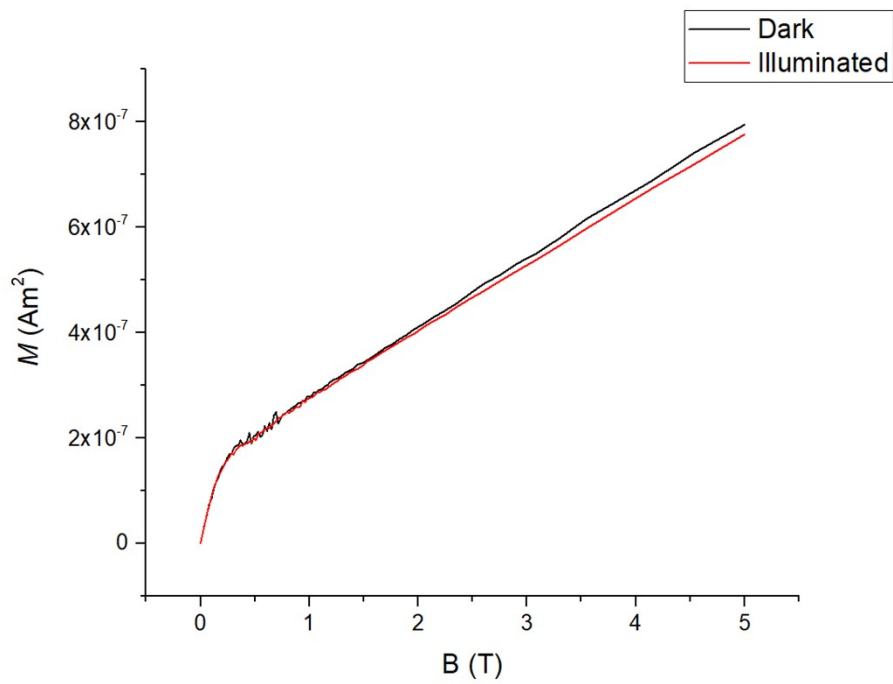

**Figure S22** The measured virgin curves of **1** on a SrTiO<sub>3</sub> disk at 30 K.

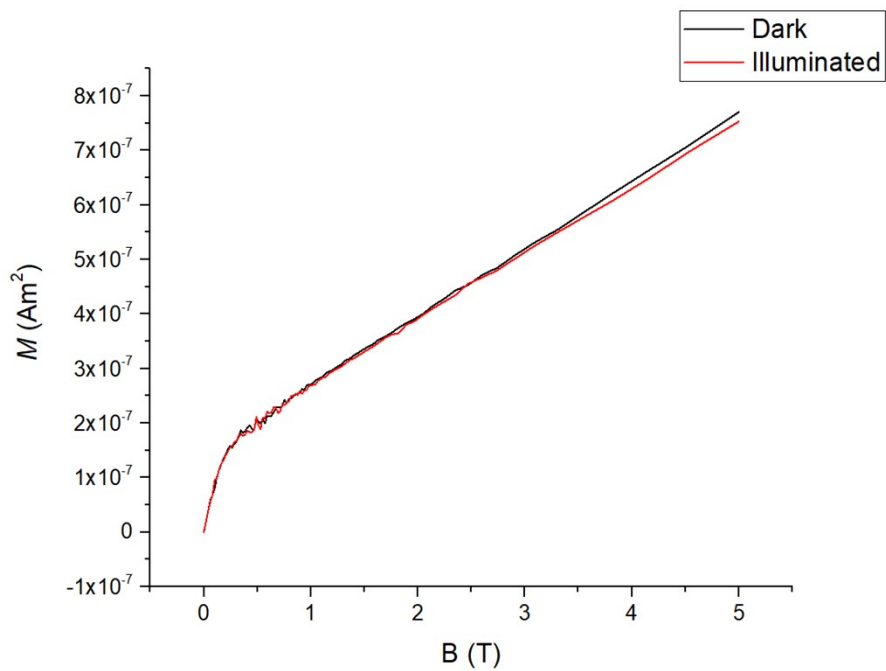

**Figure S23** The measured virgin curves of **1** on a  $\text{SrTiO}_3$  disk at 50 K.

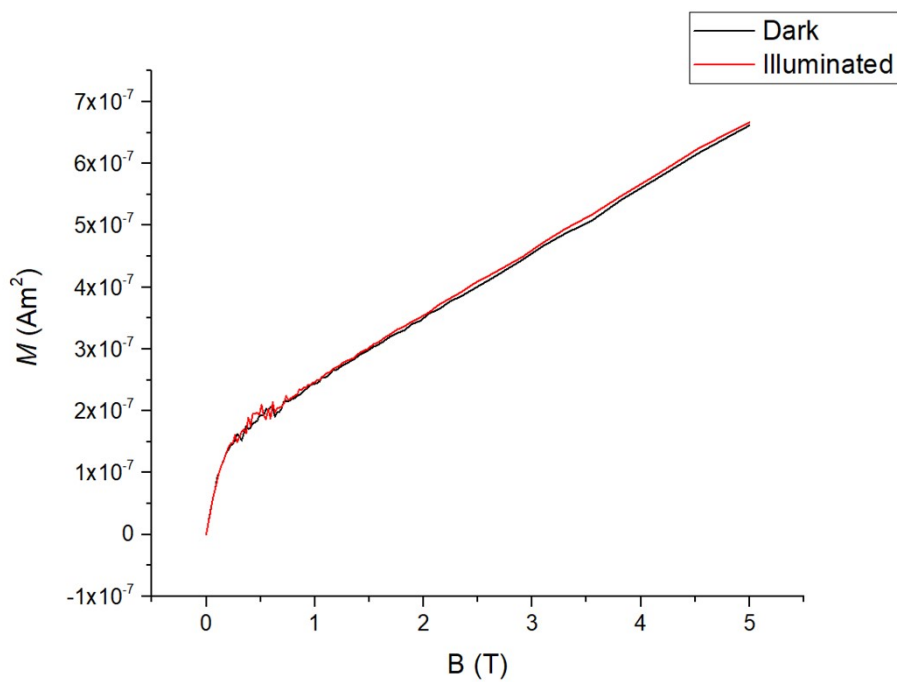

**Figure S24** The measured virgin curves of **1** on a  $\text{SrTiO}_3$  disk at 100 K.

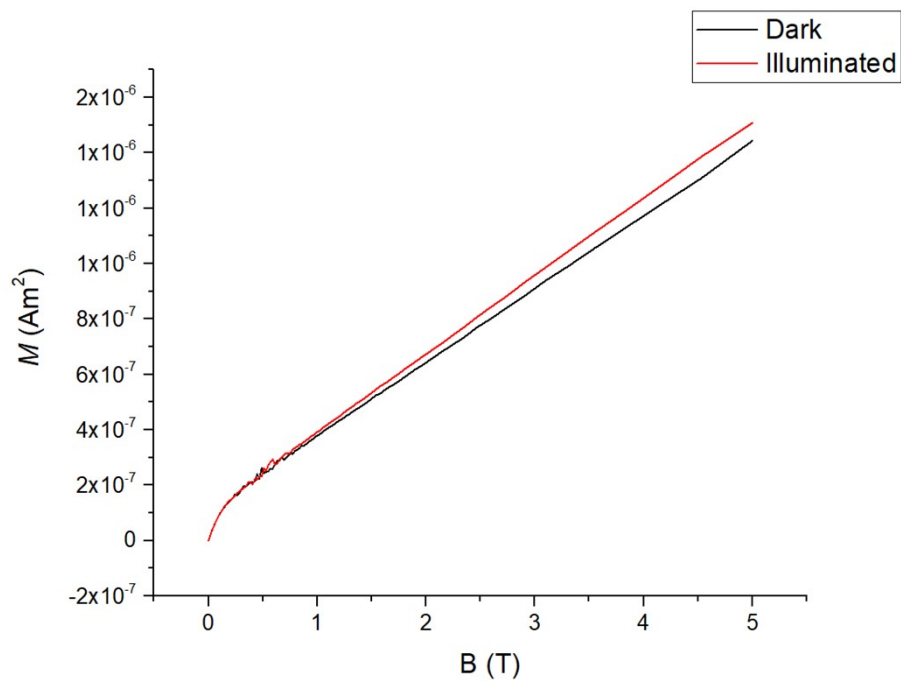

**Figure S25** The measured virgin curves of **1** on a SrTiO<sub>3</sub> disk at 300 K.

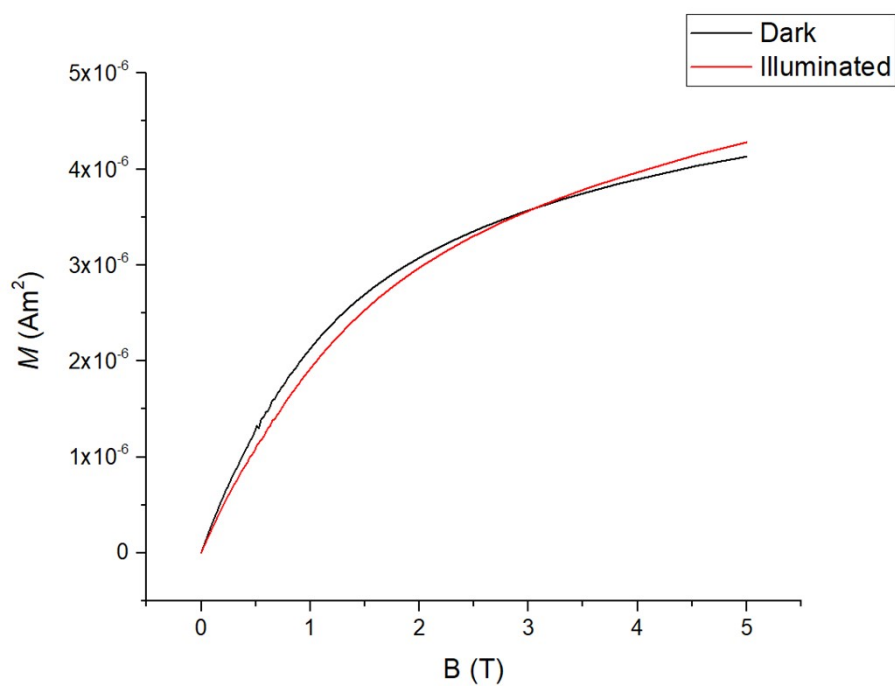

**Figure S26** The measured virgin curves of **2** on a SrTiO<sub>3</sub> disk at 2 K.

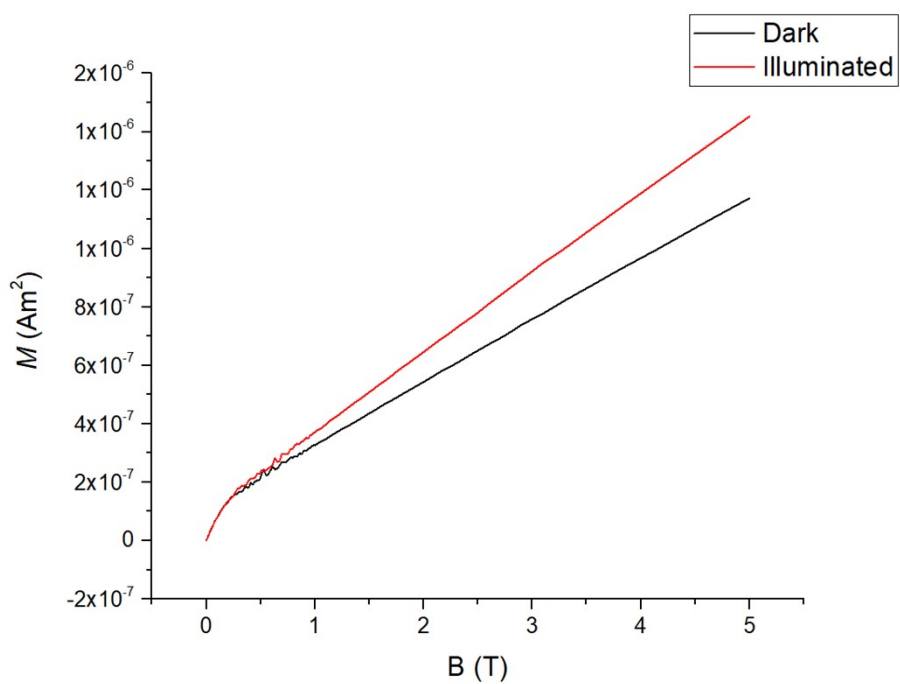

**Figure S27** The measured virgin curves of **2** on a SrTiO<sub>3</sub> disk at 30 K.

**Figure S28** The measured virgin curves of **2** on a SrTiO<sub>3</sub> disk at 50 K.

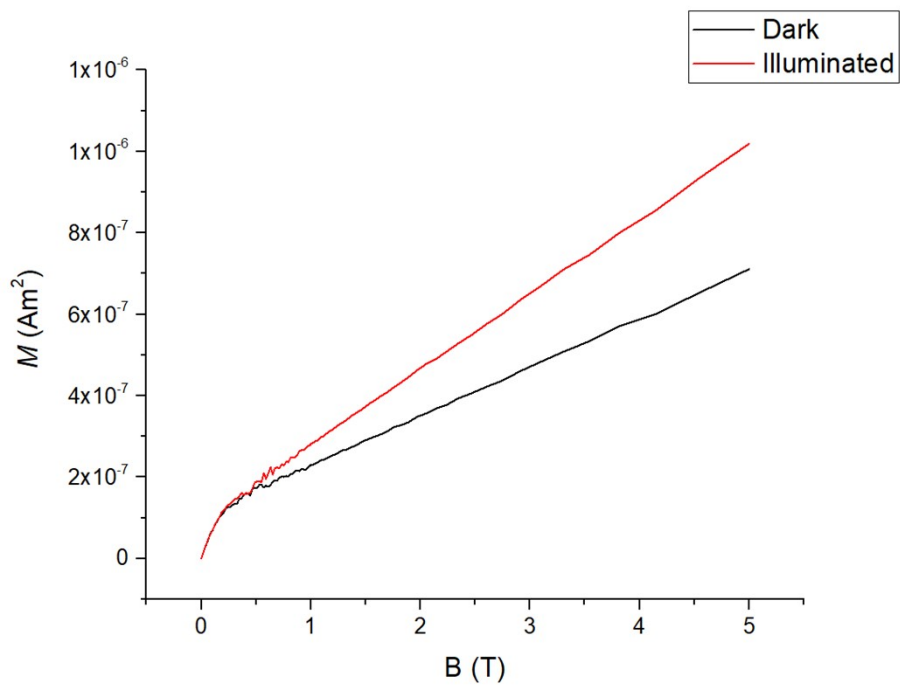



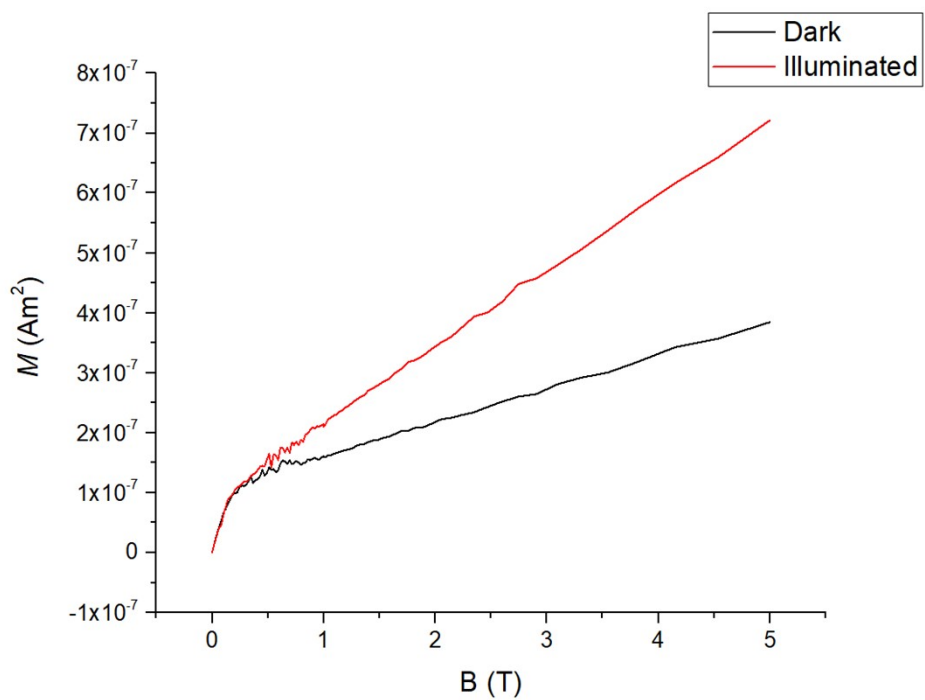

**Figure S29** The measured virgin curves of **2** on a SrTiO<sub>3</sub> disk at 100 K.

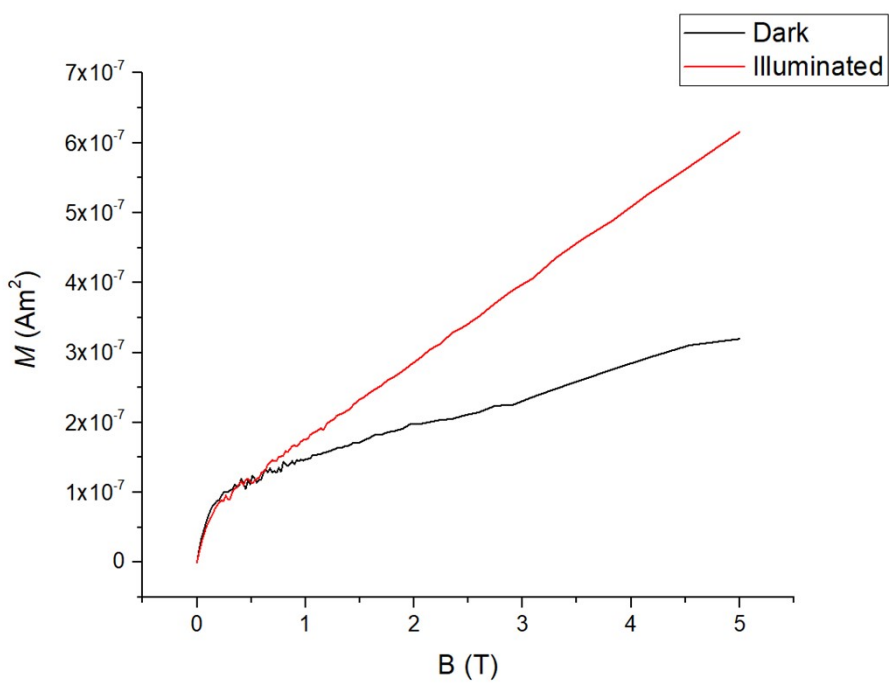

**Figure S30** The measured virgin curves of **2** on a SrTiO<sub>3</sub> disk at 300 K.

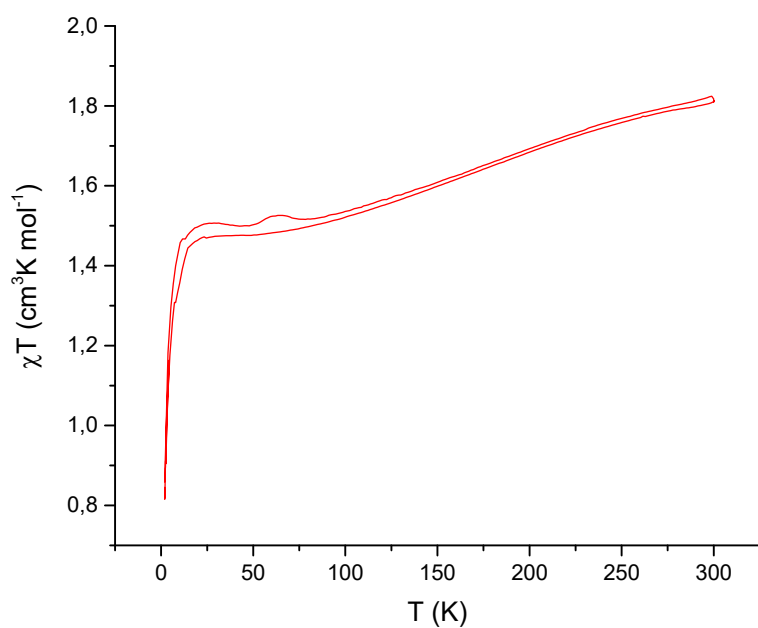

**Figure S31** SQUID variable temperature measurements for **2** measured from the amorphous solid at 1 T magnetic field.

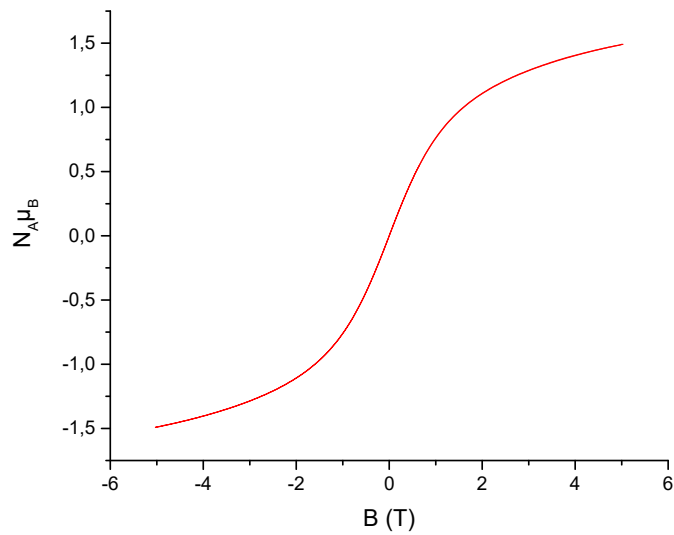

**Figure S32** SQUID variable magnetic field measurements for **2** measured from the amorphous solid at 2 K temperature.

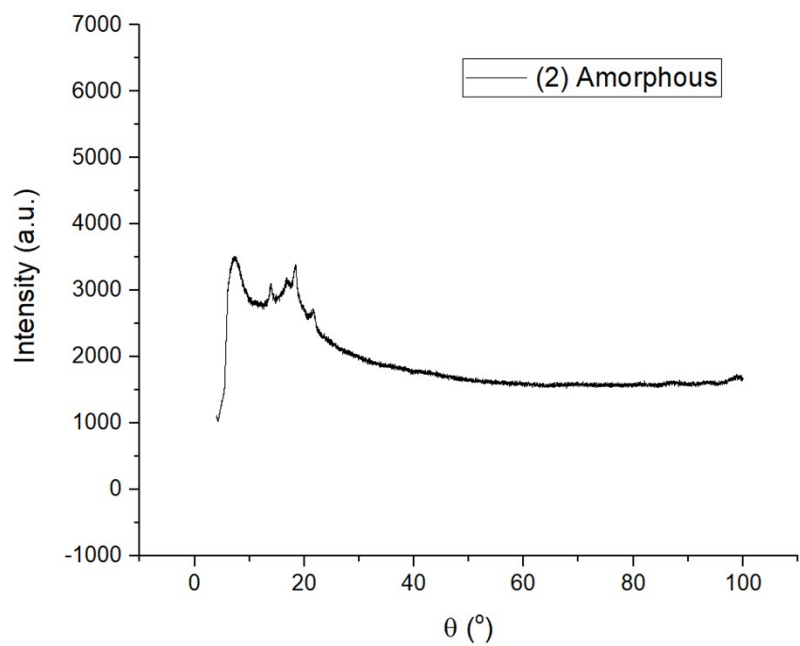

**Figure S33** Powder X-ray diffraction pattern of the amorphous sample of **2** at RT.

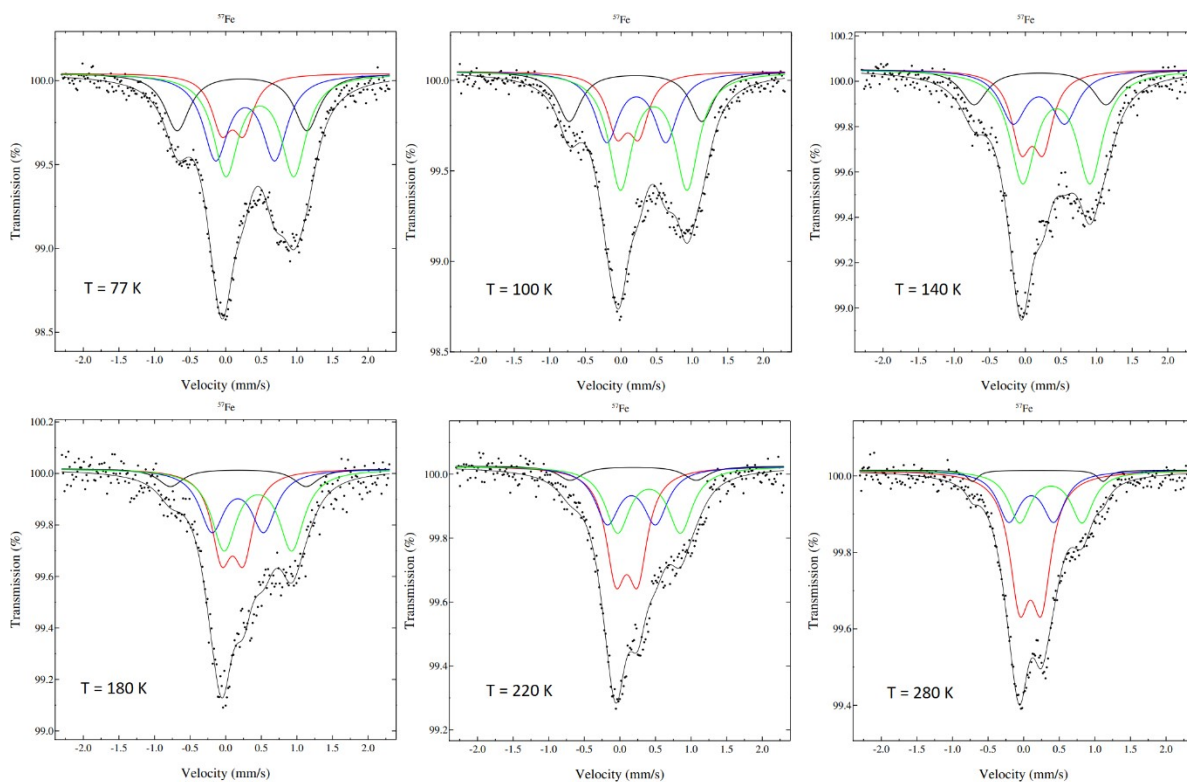

**Figure S34** Variable temperature Mössbauer spectra of the amorphous sample of **2**. The red signal is due to an instrumental impurity.

## References

- (1) Blackmore, K. J.; Lal, N.; Ziller, J. W.; Heyduk, A. F. *Eur. J. Inorg. Chem.* **2009**, No. 6, 735–743.
- (2) Chaudhuri, P.; Hess, M.; Müller, J.; Hildenbrand, K.; Bill, E.; Weyhermüller, T.; Wieghardt, K. *J. Am. Chem. Soc.* **1999**, *121* (41), 9599–9610.
- (3) CrysAlisPro program; version 1.171.38.43; Rigaku Oxford Diffraction: Oxford 2015.
- (4) Sheldrick, G. M. *Acta Crystallogr. Sect. A Found. Crystallogr.* **2007**, *64*, 112–122.
- (5) Sheldrick, G. M. *Acta Crystallogr. Sect. C Struct. Chem.* **2015**, *71* (Md), 3–8.
- (6) Dolomanov, O. V.; Bourhis, L. J.; Gildea, R. J.; Howard, J. A. K.; Puschmann, H. *J. Appl. Crystallogr.* **2009**, *42* (2), 339–341.
- (7) F. Neese. *WIREs Comput. Mol. Sci.* **2017**, *8*, e1327.
- (8) F. Neese, F. Wennmohs, U. Becker, C. Riplinger. *J. Chem. Phys.* **2020**, *152*, 224108.
- (9) J. P. Perdew, K. Burke, M. Ernzerhof. *Phys. Rev. Lett.*, **1996**, *77*, 3865–3868.
- (10) J. P. Perdew, K. Burke, M. Ernzerhof. *Phys. Rev. Lett.*, **1996**, *78*, 1396.
- (11) T. Yanai, D. P. Tew, N. C. Handy. *Chem. Phys. Lett.* **2004**, *393*, 51–57.
- (12) A. D. Becke. *Phys. Rev. A.* **1988**, *38*, 3098–3100.
- (13) C. Lee, W. Yang, R. G. Parr. *Phys. Rev. B.* **1988**, *37*, 785–789.
- (14) M. Douglas, N. M. Kroll. *Ann. Phys.* **1974**, *82*, 89–155.
- (15) B. A. Heß. *Phys. Rev. A.* **1986**, *33*, 3742–3748.
- (16) D. A. Pantazis, X.-Y. Chen, C. R. Landis, F. Neese. *J. Chem. Theory Comput.* **2008**, *4*, 908–919.
- (17) F. Weigend, R. Ahlrichs. *Phys. Chem. Chem. Phys.* **2005**, *7*, 3297–3305.
- (18) R. R. Gagne, C. A. Koval and G. C. Lisensky, *Inorg. Chem.*, 1980, **19**, 2854–2855.
